# Supplementary material for: Integrated “all-in-one” strategy to construct highly efficient Pd catalyst for CO 2 transformation
Source: Royal Society of Chemistry journal article supplement (doi:10.1039/d4sc03106g), 2024-01-01
Supplement: d4sc03106g1.pdf [file d4sc03106g1.pdf]

## Supporting Information for

# Integrated “all-in-one” strategy to construct highly efficient Pd catalyst for CO<sub>2</sub> transformation

Lingfang Kong,<sup>+a</sup> Zekun Tao,<sup>+a</sup> Yunjia Li,<sup>a</sup> Huiwen Gong,<sup>a</sup> Yun Bai,<sup>a</sup> Longbin Li,<sup>a</sup> Xianjin Zhang,<sup>b</sup> Zhonggao Zhou<sup>\*a</sup> and Yiwang Chen<sup>\*a</sup>

\* Corresponding authors

<sup>a</sup> College of Chemistry and Chemical Engineering/Analysis and Testing Center/Key Laboratory of Jiangxi University for Functional Materials Chemistry, Gannan Normal University, Ganzhou 341000, P. R. China

E-mail: [zhgzhou@foxmail.com](mailto:zhgzhou@foxmail.com), [ywchen@ncu.edu.cn](mailto:ywchen@ncu.edu.cn)

<sup>b</sup> Institute of Chemistry Education, Fujian Institute of Education, Fuzhou 350025, P. R. China

<sup>+</sup>L. Kong and Z. Tao contributed equally to this work

## Table of Contents

|                                                                                               |           |
|-----------------------------------------------------------------------------------------------|-----------|
| Supporting Information for .....                                                              | 1         |
| <b>1. Experimental Section.....</b>                                                           | <b>3</b>  |
| <b>1.1 General.....</b>                                                                       | <b>3</b>  |
| <b>1.2 Synthesis and Characterization of Imidazolium Salts.....</b>                           | <b>3</b>  |
| <b>1.3 Synthesis and Characterization of Propargylic Amines .....</b>                         | <b>8</b>  |
| <b>1.4 General Procedure for the Synthesis of Propargylic Amines with CO<sub>2</sub>.....</b> | <b>8</b>  |
| <b>2. Catalytic Section .....</b>                                                             | <b>9</b>  |
| <b>2.1 Table S1. Comparison of TOFs with Other Reported Catalysts.....</b>                    | <b>9</b>  |
| <b>3. Characterizations .....</b>                                                             | <b>11</b> |
| <b>3.1 Comparative NMR Spectra of Imidazolium Salts.....</b>                                  | <b>11</b> |
| <b>3.2 Comparative FT-IR Spectra of Imidazolium Salts.....</b>                                | <b>16</b> |
| <b>3.3 HR-MS Spectra of Imidazolium Salts.....</b>                                            | <b>19</b> |
| <b>3.4 XPS Spectra of Cat1 and Cat5 .....</b>                                                 | <b>23</b> |
| <b>3.5 TGA Spectra of Cat1-5 .....</b>                                                        | <b>24</b> |
| <b>3.6 NMR Spectra and Color of Cat1 at Different Temperatures.....</b>                       | <b>25</b> |
| <b>4. Kinetic Experiments.....</b>                                                            | <b>26</b> |
| <b>5. Gram-scale Reaction, Product Properties, and <sup>1</sup>H NMR Spectra.....</b>         | <b>27</b> |
| <b>6. Catalyst Stability Evaluation.....</b>                                                  | <b>28</b> |
| <b>7. NMR Spectra of Imidazolium Salts .....</b>                                              | <b>36</b> |
| <b>8. References.....</b>                                                                     | <b>46</b> |

## 1. Experimental Section

### 1.1 General

All nuclear magnetic resonance (NMR) spectra were acquired using a Bruker Advance III 400 NMR spectrometer, with chemical shifts ( $\delta$ ) reported in ppm. Fourier-transform infrared (FT-IR) spectra were recorded on an Avatar Nicolet FT-IR spectrometer either neat with smart OMNI-transmission accessories or with KBr pellets using standard methods, with frequencies reported in  $\text{cm}^{-1}$ . Liquid chromatography–high–resolution mass spectrometry (LC-HR/MS) spectra were obtained using a Waters G2-XS QTOF mass spectrometer, with samples dissolved in methanol. X-ray photoelectron Spectrometer (XPS) measurements were conducted on an ESCALAB 250Xi X-ray photoelectron spectrometer (Thermo Fisher) using an Al Ka source (15 kV, 10 mA) with Ar etching for 30 min (the charge of C-C carbon species here was corrected to 284.8 eV).

All reagents were commercially sourced from Sinopharm Chemical Reagent Limited Corporation or Shanghai Aladdin Biochemical Technology Co., Ltd., and used without further purification unless specified otherwise.  $\text{CO}_2$  ( $\text{CO}_2$ , 99.99%) and simulated flue gas ( $\text{CO}_2/\text{N}_2$ , Vol/Vol = 15:85) were procured from Ganzhou Shengda Gas Co., Ltd. Flash column chromatography was carried out using silica gel (300-400 mesh).

### 1.2 Synthesis and Characterization of Imidazolium Salts

#### Synthesis of Im-Br1-4

2-Bromoethyl glucoside (2.5 equivalent) and *N*-alkylated imidazole (1.0 equivalent) were dissolved in anhydrous acetonitrile and the solution was heated at  $120^\circ\text{C}$  for 48 hours. Upon cooling, the acetonitrile was evaporated

using a rotary evaporator. Purification was achieved by column chromatography on silica gel using a gradient elution of dichloromethane/methanol (V:V = 20:1 to 10:1), resulting in the isolation of products Im-Br1-4 (84-96%) as pale yellow solids.

### Synthesis of Im-Br5

Im-Br1 (0.131 g, 1.0 mmol) was dissolved in anhydrous methanol (10 mL) and reacted with a catalytic quantity of freshly prepared sodium methoxide (NaOMe) to achieve a basic environment, maintaining a pH of about 9.0. The solution was stirred at room temperature (RT) overnight. Subsequent neutralization was carried out using dry Amberlite IR 120 (H<sup>+</sup>) resin to achieve a pH of around 7.0. The crude mixture underwent simple washing successively with NaHCO<sub>3</sub>, NaCl, and H<sub>2</sub>O. Solvent evaporation gave the product Im-Br5 (95%) as a pale yellow viscous liquid.

### Synthesis of Cat1-5

In a 100 mL round-bottom flask, Im-Br1 (0.131 g, 0.10 mmol) were dissolved in 50.0 mL of dichloromethane, and aqueous solution of sodium tetrachloropalladate (0.01 g·mL<sup>-1</sup>, 4.4 mL) was added in the flask and the mixture was stirred at RT overnight. The solution was washed twice with ultrapure water, then removed by rotary evaporation and dried under vacuum to get the product Cat1 (0.123 g, 92%) as a reddish brown solid. Cat2-4 were prepared in a similar method of that for Cat1. Cat2-4 absorb moisture easily and followed the trend of the other palladium salts, being reddish brown.

Im-Br1, 75%, <sup>1</sup>H NMR (400 MHz, CDCl<sub>3</sub>) δ 10.41 (s, 2H), 7.72 (dd, *J* = 12.6, 7.6 Hz, 4H), 7.53 (s, 4H), 7.42 (t, *J* = 12.4 Hz, 4H), 5.70 (s, 2H), 5.18 (s, 2H), 4.99 (t, *J* = 9.4 Hz, 2H), 4.83 (t, *J* = 9.6 Hz, 4H), 4.72 – 4.66 (m, 4H), 4.55 (d, *J* = 7.9 Hz, 2H), 4.23 (s, 2H), 4.10 (d, *J* = 5.0 Hz, 1H), 4.03 (s, 1H), 3.94 (d, *J* = 11.2 Hz, 2H), 3.67 (d, *J* = 9.5 Hz, 2H), 3.17 (s, 2H), 1.90 – 1.80 (m, 20H), 1.53 (s, 4H) ppm; <sup>13</sup>C NMR (101 MHz, CDCl<sub>3</sub>) δ 170.6, 169.9, 169.4, 169.3,

142.4, 133.4, 132.1, 130.8, 130.1, 127.2, 127.0, 114.3, 113.5, 100.0, 72.5, 71.6, 70.8, 68.0, 61.6, 53.6, 50.6, 49.9, 47.8, 20.8, 20.5, 20.5, 20.4 ppm. FT-IR ( $\text{cm}^{-1}$ ): 3422.78, 3029.74, 2959.65, 1749.14, 1629.30, 1564.71, 1431.76, 1374.37, 1227.92, 1038.52, 909.18, 756.04, 604.81, 544.35, 433.80. HR-MS  $m/z$ :  $[\text{M}-\text{Br}]^{2+}$  calcd for  $\text{C}_{54}\text{H}_{64}\text{N}_4\text{O}_{20}$ , 544.20515; found 544.20352.

Im-Br2, 80%,  $^1\text{H}$  NMR (400 MHz,  $\text{CDCl}_3$ )  $\delta$  9.78 (s, 2H), 7.74 (s, 2H), 7.54 (s, 4H), 7.49 (s, 2H), 5.57 (s, 4H), 5.16 (t,  $J = 9.5$  Hz, 2H), 4.99 (t,  $J = 9.7$  Hz, 2H), 4.88 (dd,  $J = 9.6, 8.1$  Hz, 2H), 4.64 (dd,  $J = 18.1, 5.8$  Hz, 4H), 4.58 – 4.51 (m, 2H), 4.19 (dd,  $J = 12.5, 4.5$  Hz, 3H), 4.12 (dd,  $J = 16.9, 6.5$  Hz, 3H), 4.00 (dd,  $J = 9.6, 6.2$  Hz, 2H), 3.81 – 3.76 (m, 2H), 2.04 (s, 4H), 1.97 (d,  $J = 8.5$  Hz, 20H) ppm;  $^{13}\text{C}$  NMR (101 MHz,  $\text{CDCl}_3$ )  $\delta$  170.8, 170.2, 169.9, 169.7, 137.0, 134.4, 130.5, 123.6, 122.5, 100.5, 72.6, 72.1, 71.3, 68.5, 67.9, 62.0, 52.9, 50.0, 21.1, 20.8 ppm. FT-IR ( $\text{cm}^{-1}$ ): 3422.68, 3142.06, 3094.39, 2959.81, 1749.10, 1633.94, 1563.48, 1436.24, 1373.71, 1228.29, 1163.63, 1039.94, 909.73, 840.19, 729.27, 603.28, 419.63. HR-MS  $m/z$ :  $[\text{M}-\text{Br}]^{2+}$  calcd for  $\text{C}_{48}\text{H}_{64}\text{N}_4\text{O}_{20}$ , 494.18950; found, 494.18950.

Im-Br3, 85%,  $^1\text{H}$  NMR (400 MHz,  $\text{CDCl}_3$ )  $\delta$  7.70 (d,  $J = 3.2$  Hz, 4H), 7.44 (s, 4H), 5.67 – 5.42 (m, 4H), 5.19 – 5.12 (m, 2H), 5.05 (s, 1H), 4.98 (t,  $J = 8.6$  Hz, 2H), 4.83 – 4.77 (m, 2H), 4.67 (s, 3H), 4.57 (d,  $J = 7.8$  Hz, 3H), 4.22 (s, 1H), 4.14 – 4.06 (m, 4H), 3.83 (d,  $J = 6.0$  Hz, 2H), 3.49 – 3.29 (m, 2H), 2.70 (s, 6H), 2.05 (d,  $J = 8.4$  Hz, 6H), 2.01 – 1.96 (m, 14H), 1.94 (s, 4H) ppm;  $^{13}\text{C}$  NMR (101 MHz,  $\text{CDCl}_3$ )  $\delta$  170.9, 170.2, 169.8, 145.4, 134.4, 129.5, 122.4, 100.5, 72.7, 72.1, 71.3, 68.5, 68.2, 62.0, 53.7, 51.7, 48.9, 21.1, 20.8, 11.4 ppm. FT-IR ( $\text{cm}^{-1}$ ): 3432.60, 2958.18, 1748.75, 1632.64, 1531.70, 1429.29, 1375.24, 1229.56, 1038.05, 910.28, 749.72, 599.75, 550.80, 408.41. HR-MS  $m/z$ :  $[\text{M}-\text{Br}]^{2+}$  calcd for  $\text{C}_{46}\text{H}_{60}\text{N}_4\text{O}_{20}$ , 508.20515; found, 508.20855.

Im-Br4, 88%,  $^1\text{H}$  NMR (400 MHz,  $\text{DMSO}-d_6$ )  $\delta$  10.02 (s, 2H), 8.11 (d,  $J = 8.0$  Hz, 2H), 7.93 (d,  $J = 7.8$  Hz, 2H), 7.66 (d,  $J = 7.7$  Hz, 2H), 7.63 (d,  $J = 8.2$  Hz, 2H), 7.56 (s, 4H), 5.78 (s, 4H), 4.51 (t,  $J = 7.2$  Hz, 4H), 1.34 – 1.20 (m,

24H), 0.83 (dd,  $J = 8.0, 5.5$  Hz, 6H) ppm.  $^{13}\text{C}$  NMR (101 MHz,  $\text{DMSO-}d_6$ )  $\delta$  143.5, 135.7, 132.4, 131.8, 130.0, 127.7, 115.0, 115.0, 50.4, 49.6, 48.0, 32.2, 29.5, 26.8, 23.1, 14.9 ppm. FT-IR ( $\text{cm}^{-1}$ ): 3129.71, 3043.10, 2926.50, 1748.60, 1661.68, 1612.57, 1561.02, 1518.02, 1463.46, 1422.94, 1379.67, 1345.07, 1263.28, 1215.10, 1194.00, 1131.38, 1019.60, 860.72, 765.03, 684.52, 568.91. HR-MS  $m/z$ :  $[\text{M-Br}]^{2+}$  calcd for  $\text{C}_{38}\text{H}_{52}\text{N}_4$ , 282.20905; found, 282.21105.

Im-Br5, 94%,  $^1\text{H}$  NMR (400 MHz,  $\text{DMSO-}d_6$ )  $\delta$  10.08 (s, 2H), 8.15 (d,  $J = 7.4$  Hz, 2H), 7.96 (d,  $J = 7.4$  Hz, 2H), 7.63 (t,  $J = 7.0$  Hz, 4H), 7.57 (s, 4H), 5.82 (s, 4H), 5.24 (s, 2H), 5.09 (d,  $J = 30.9$  Hz, 2H), 4.77 (s, 3H), 4.68 (s, 1H), 4.24 (d,  $J = 7.8$  Hz, 2H), 4.15 – 4.09 (m, 2H), 4.04 – 3.97 (m, 2H), 3.18 – 3.08 (m, 4H), 3.03 (d,  $J = 8.1$  Hz, 2H), 2.92 (d,  $J = 7.8$  Hz, 2H) ppm;  $^{13}\text{C}$  NMR (101 MHz,  $\text{DMSO-}d_6$ )  $\delta$  144.5, 135.7, 132.3, 131.7, 123.0, 127.7, 115.2, 114.9, 104.1, 77.9, 77.5, 74.4, 71.0, 67.0, 62.0, 50.4, 48.2 ppm. FT-IR ( $\text{cm}^{-1}$ ): 3388.07, 3130.84, 3060.75, 2965.42, 2922.13, 2853.27, 1742.99, 1632.36, 1557.80, 1515.89, 1452.93, 1372.23, 1344.86, 1287.08, 1218.65, 1197.41, 1162.93, 1076.70, 1034.22, 895.34, 863.37, 758.29, 666.36, 566.14. HR-MS  $m/z$ :  $[\text{M-Br}]^{2+}$  calcd for  $\text{C}_{38}\text{H}_{48}\text{N}_4\text{O}_{12}$ , 376.16289; found, 376.16494.

Cat1, 92%,  $^1\text{H}$  NMR (400 MHz,  $\text{CDCl}_3$ )  $\delta$  9.88 (s, 2H), 8.06 (s, 4H), 7.87 (s, 4H), 7.60 (s, 4H), 5.89 (s, 3H), 5.30 (s, 1H), 5.12 (d,  $J = 9.1$  Hz, 2H), 4.96 (d,  $J = 9.7$  Hz, 4H), 4.90 – 4.78 (m, 4H), 4.70 (d,  $J = 7.1$  Hz, 2H), 4.48 (s, 2H), 4.34 (s, 2H), 4.21 (d,  $J = 9.6$  Hz, 2H), 4.09 (d,  $J = 10.8$  Hz, 2H), 3.84 (s, 2H), 1.97 (d,  $J = 15.9$  Hz, 20H), 1.70 (s, 4H) ppm;  $^{13}\text{C}$  NMR (101 MHz,  $\text{CDCl}_3$ )  $\delta$  170.9, 170.2, 169.8, 142.2, 133.9, 132.6, 131.3, 130.9, 127.8, 114.8, 114.1, 100.5, 73.0, 72.0, 71.3, 68.5, 68.4, 62.0, 53.7, 51.4, 48.5, 21.2, 20.9, 20.9, 20.8 ppm. FT-IR ( $\text{cm}^{-1}$ ): 3441.45, 2960.63, 1749.56, 1628.39, 1565.79, 1427.51, 1372.95, 1227.05, 1035.94, 749.83, 700.59, 599.07, 538.82, 430.84. HR-MS  $m/z$ :  $[\text{M-PdCl}_4]^{2+}$  calcd for  $\text{C}_{54}\text{H}_{64}\text{N}_4\text{O}_{20}$ , 544.20515; found 544.20901.

Cat2, 98%,  $^1\text{H}$  NMR (400 MHz,  $\text{CDCl}_3$ )  $\delta$  9.35 (s, 2H), 7.93 (s, 4H), 7.62 (s, 2H), 7.51 (s, 2H), 5.68 (s, 3H), 5.29 (s, 1H), 5.18 (t,  $J = 9.2$  Hz, 2H), 5.02 (t,

$J = 9.2$  Hz, 2H), 4.91 (t,  $J = 8.1$  Hz, 2H), 4.74 (d,  $J = 6.8$  Hz, 4H), 4.59 (s, 2H), 4.31 (s, 2H), 4.23 (s, 4H), 4.16 (d,  $J = 11.5$  Hz, 2H), 3.88 (d,  $J = 7.8$  Hz, 2H), 2.01 (t,  $J = 15.8$  Hz, 24H) ppm;  $^{13}\text{C}$  NMR (101 MHz,  $\text{CDCl}_3$ )  $\delta$  170.9, 170.2, 170.0, 169.8, 136.6, 134.5, 130.9, 124.1, 122.8, 100.5, 72.7, 72.0, 71.4, 68.41, 68.2, 62.0, 53.7, 53.5, 50.5, 21.4, 21.3, 20.9 ppm. FT-IR ( $\text{cm}^{-1}$ ): 3494, 3146, 2968, 1956, 1629, 1582, 1533, 1431, 1376, 1226, 1171, 1035, 912, 755, 604. HR-MS  $m/z$ :  $[\text{M-PdCl}_4]^{2+}$  calcd for  $\text{C}_{48}\text{H}_{64}\text{N}_4\text{O}_{20}$ , 494.18950; found, 494.19304.

Cat3, 98%,  $^1\text{H}$  NMR (400 MHz,  $\text{CDCl}_3$ )  $\delta$  7.71 (s, 4H), 7.65 (s, 2H), 7.60 (s, 2H), 5.65 (t,  $J = 17.8$  Hz, 4H), 5.20 (t,  $J = 9.4$  Hz, 2H), 5.04 (t,  $J = 9.6$  Hz, 2H), 4.90 (t,  $J = 8.7$  Hz, 2H), 4.75 (d,  $J = 7.7$  Hz, 2H), 4.64 (s, 4H), 4.36 (s, 2H), 4.31 – 4.19 (m, 4H), 4.15 (d,  $J = 11.4$  Hz, 2H), 3.89 (d,  $J = 9.3$  Hz, 2H), 2.90 (s, 6H), 2.10 (s, 6H), 2.02 (d,  $J = 9.5$  Hz, 18H) ppm;  $^{13}\text{C}$  NMR (101 MHz,  $\text{CDCl}_3$ )  $\delta$  171.0, 170.3, 170.0, 169.9, 145.4, 134.2, 130.1, 122.9, 122.5, 100.5, 72.9, 72.0, 71.4, 68.5, 68.2, 62.0, 52.5, 49.5, 21.4, 21.3, 21.0, 12.0 ppm. FT-IR ( $\text{cm}^{-1}$ ): 3480, 3146, 3105, 2968, 2934, 2860, 1752, 1629, 1561, 1431, 1377, 1226, 1165, 1042, 987, 912, 803, 727, 604. HR-MS  $m/z$ :  $[\text{M-PdCl}_4]^{2+}$  calcd for  $\text{C}_{46}\text{H}_{60}\text{N}_4\text{O}_{20}$ , 508.20515; found, 508.20871.

Cat4, 95%,  $^1\text{H}$  NMR (400 MHz,  $\text{DMSO-}d_6$ )  $\delta$  10.01 (s, 2H), 8.10 (d,  $J = 7.9$  Hz, 2H), 7.92 (d,  $J = 7.8$  Hz, 2H), 7.67 (t,  $J = 5.4$  Hz, 2H), 7.63 (d,  $J = 8.2$  Hz, 2H), 7.55 (s, 4H), 5.78 (s, 4H), 4.50 (t,  $J = 7.3$  Hz, 4H), 1.30 (d,  $J = 3.1$  Hz, 8H), 1.23 (d,  $J = 11.0$  Hz, 16H), 0.85 – 0.81 (m, 6H) ppm;  $^{13}\text{C}$  NMR (101 MHz,  $\text{DMSO-}d_6$ )  $\delta$  143.5, 135.7, 132.4, 131.9, 129.9, 127.8, 115.0, 114.9, 50.5, 48.0, 32.20, 29.5, 29.5, 29.5, 26.8, 23.1, 15.0 ppm. FT-IR ( $\text{cm}^{-1}$ ): 3124.38, 3027.67, 2955.04, 2923.84, 2852.83, 1717.73, 1633.64, 1613.73, 1456.48, 1422.46, 1340.72, 1261.30, 1261.30, 1215.89, 1179.74, 1094.89, 1018.06, 868.22, 802.31, 752.41, 689.51, 602.02, 570.65. HR-MS  $m/z$ :  $[\text{M-PdCl}_4]^{2+}$  calcd for  $\text{C}_{38}\text{H}_{52}\text{N}_4$ , 282.20905; found, 282.21053.

Cat5, 97%,  $^1\text{H}$  NMR (400 MHz,  $\text{DMSO-}d_6$ )  $\delta$  10.10 (s, 2H), 8.14 (d,  $J = 7.1$  Hz, 2H), 7.95 (d,  $J = 7.4$  Hz, 2H), 7.67 – 7.59 (m, 4H), 7.57 (s, 4H), 5.82 (s, 4H),

5.27 (d,  $J = 18.8$  Hz, 2H), 5.07 (s, 2H), 4.76 (s, 4H), 4.23 (d,  $J = 7.7$  Hz, 2H), 4.10 (s, 2H), 4.01 (s, 2H), 3.15 (t,  $J = 8.7$  Hz, 2H), 3.12 – 3.07 (m, 2H), 3.03 (d,  $J = 9.0$  Hz, 2H), 2.90 (t,  $J = 8.2$  Hz, 2H) ppm;  $^{13}\text{C}$  NMR (101 MHz, DMSO- $d_6$ )  $\delta$  144.6, 135.7, 132.3, 131.7, 130.0, 127.8, 115.3, 114.9, 104.1, 77.9, 77.5, 74.4, 71.0, 67.1, 61.9, 50.4, 48.3 ppm. FT-IR ( $\text{cm}^{-1}$ ): 2973.83, 2923.74, 2856.07, 1745.01, 1633.75, 1556.04, 1518.69, 1487.36, 1455.67, 1421.58, 1373.17, 1339.25, 1218.69, 1186.56, 1070.35, 1024.42, 949.53, 856.57, 758.90, 652.34, 599.07, 566.15, 534.58. HR-MS  $m/z$ :  $[\text{M-PdCl}_4]^{2+}$  calcd for  $\text{C}_{38}\text{H}_{48}\text{N}_4\text{O}_{12}$ , 376.16289; found, 376.16457.

### 1.3 Synthesis and Characterization of Propargylic Amines

For the synthesis of propargylic amine **6**, propargyl halide (1.0 mmol) was added dropwise to the corresponding amine (3.0 mmol) at  $0^\circ\text{C}$  in the dark, and the mixture was slowly warmed to RT. The reaction was then stirred for 12-24 hours. Subsequently, NaOH and dichloromethane were introduced. After extracting the aqueous layer with dichloromethane, the organic phase was washed with saturated brine, dried over  $\text{MgSO}_4$ , and the solvent was evaporated. The crude product was further purified by flash column chromatography on silica gel using a gradient elution of  $V_{\text{PE}}/V_{\text{EA}} = 20:1$ .

### 1.4 General Procedure for the Synthesis of Propargylic

#### Amines with $\text{CO}_2$

In a standard procedure, Cat1 (0.25-0.5 mol%), propargylic amine **6** (0.05 mmol), and NaOAc (0.075 mmol) were combined in DMSO (1.0 mL) within a reaction vessel. A simulated flue gas ( $\text{CO}_2/\text{N}_2$ , Vol/Vol = 15:85, bubbling) was introduced into the preheated reaction mixture using a long hollow needle ( $\varnothing$  0.7  $\times$  200 mm) immersed in a  $70^\circ\text{C}$  oil bath. The reaction mixture was then stirred for a specified duration. The yield was quantified using  $^1\text{H}$  NMR



spectroscopy. To determine the isolated yields of purified products, the crude material was concentrated and subjected to purification via column chromatography on silica gel using a gradient elution of petroleum ether/ethyl acetate (V:V = 20:1 to 10:1). The isolated yields were calculated based on the initial reactants.

## 2. Catalytic Section

**2.1 Table S1. Comparison of TOFs with Other Reported Catalysts**

| Entry    | Catalyst                               | T (°C)/t (h)    | P (atm)     | TOF (h <sup>-1</sup> ) | TON        | Cycles    | Ref.          |
|----------|----------------------------------------|-----------------|-------------|------------------------|------------|-----------|---------------|
| <b>1</b> | <b>Cat1</b>                            | <b>70/0.083</b> | <b>0.15</b> | <b>3456</b>            | <b>400</b> | <b>10</b> | <b>Herein</b> |
| 2        | CuI/DBU                                | 50/4            | 1.0         | 2                      | 8          | /         | 1             |
| 3        | AgOAc                                  | 25/7            | 1.0         | 7                      | 49         | /         | 2             |
| 4        | AgNO <sub>3</sub> /DBU                 | 60/2            | 1.0         | 94                     | 188        | /         | 3             |
| 5        | CoBr <sub>2</sub> /TBD                 | 80/9            | 1.0         | 1                      | 9          | /         | 4             |
| 6        | ZnCl <sub>2</sub> (TBD) <sub>2</sub>   | 60/12           | 1.0         | 2                      | 24         | /         | 5             |
| 7        | Ag <sub>27</sub> -MOF                  | 25/6            | 1.0         | 16                     | 96         | 4         | 6             |
| 8        | TOS-Ag <sub>4</sub>                    | 25/24           | 1.0         | 4                      | 96         | 5         | 7             |
| 9        | Zn <sub>116</sub>                      | 70/12           | 1.0         | 31                     | 372        | 10        | 8             |
| 10       | PdSCS                                  | 50/0.33         | 1.0         | 60                     | 19.8       | /         | 9             |
| 11       | Ag@TpPa-1                              | 60/18           | 1.0         | 17                     | 306        | 5         | 10            |
| 12       | Ag@2,6-FPP-TAPT                        | 50/2            | 1.0         | 964                    | 1928       | 4         | 11            |
| 13       | Cu <sub>2</sub> O@ZIF-8                | 40/6            | 1.0         | 3.3                    | 19.8       | 5         | 12            |
| 14       | Cu <sup>I</sup> /Cu <sup>II</sup> -MOF | 30/0.17         | 1.0         | 230                    | 39.1       | 5         | 13            |
| 15       | Pd@BBA-2                               | 40/2            | 1.0         | 43.68                  | 87.36      | 5         | 14            |
| 15       | AuCl(IPr)                              | 40/15           | 1.0         | 3.0                    | 45         | /         | 15            |
| 16       | AgCl(IPr)                              | 40/15           | 1.0         | 3.0                    | 45         | /         | 16            |
| 17       | [Au]                                   | RT/24           | air         | 5.33                   | 127.9      | /         | 17            |
| 18       | Ag-HMP-2                               | 60/20           | 1.0         | 10.6                   | 212        | /         | 18            |

| Entry | Catalyst                                | T (°C)/t (h) | P (atm) | TOF (h <sup>-1</sup> ) | TON   | Cycles | Ref. |
|-------|-----------------------------------------|--------------|---------|------------------------|-------|--------|------|
| 19    | Ag-MOF-1                                | RT/24        | 1.0     | 0.56                   | 13.44 | /      | 19   |
| 20    | 2Gn[TEG][Au]                            | RT/24        | 1.0     | 1.77                   | 42.48 | /      | 20   |
| 21    | AcGlu-Im-PdCl <sub>4</sub>              | 70/0.5       | 0.15    | 1440                   | 720   | /      | 21   |
| 22    | Ag <sub>4</sub> NC                      | 25/2         | 1.0     | 2873                   | 5746  | 5      | 22   |
| 23    | Cu <sub>6</sub> -NH <sub>2</sub>        | 30/1.5       | 1.0     | 387                    | 580.5 | 5      | 23   |
| 24    | AcGlu-Im-Br <b>3</b> /CuBr <sub>2</sub> | 80/0.33      | 1.0     | 400                    | 132   | /      | 24   |
| 25    | Cu <sup>I</sup> -TpBD-COF               | 80/5         | 1.0     | 1058                   | 5290  | 9      | 25   |
| 26    | Cu <sup>I</sup> /Cu <sup>II</sup> DAWN  | 40/5         | 1.0     | 38.4                   | 192   | 5      | 26   |

### 3. Characterizations

#### 3.1 Comparative NMR Spectra of Imidazolium Salts

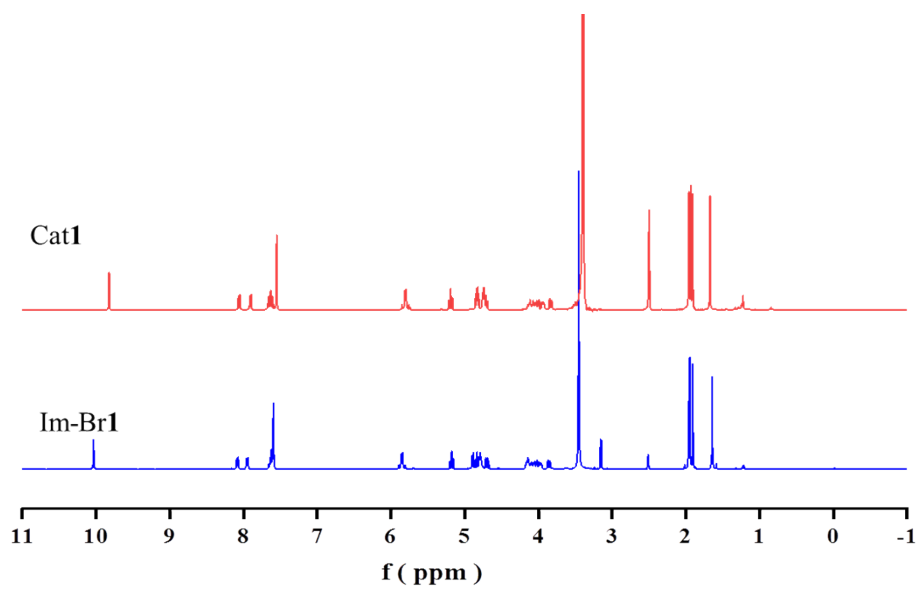

Fig. S1 <sup>1</sup>H NMR of Cat1/Im-Br1 in DMSO-*d*<sub>6</sub>.

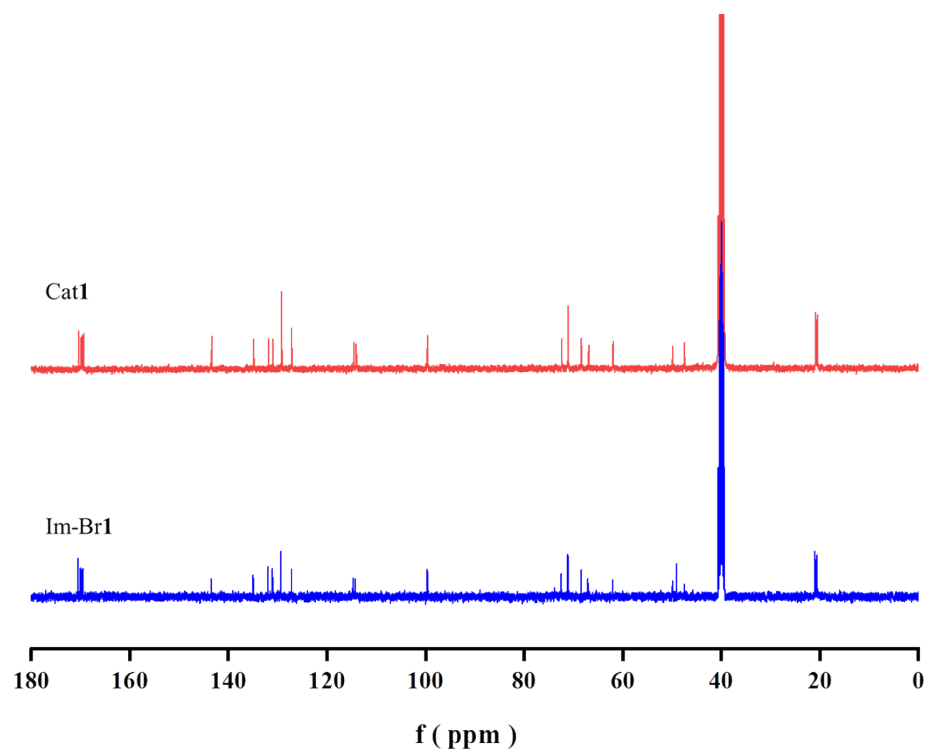

Fig. S2 <sup>13</sup>C NMR of Cat1/Im-Br1 in DMSO-*d*<sub>6</sub>.

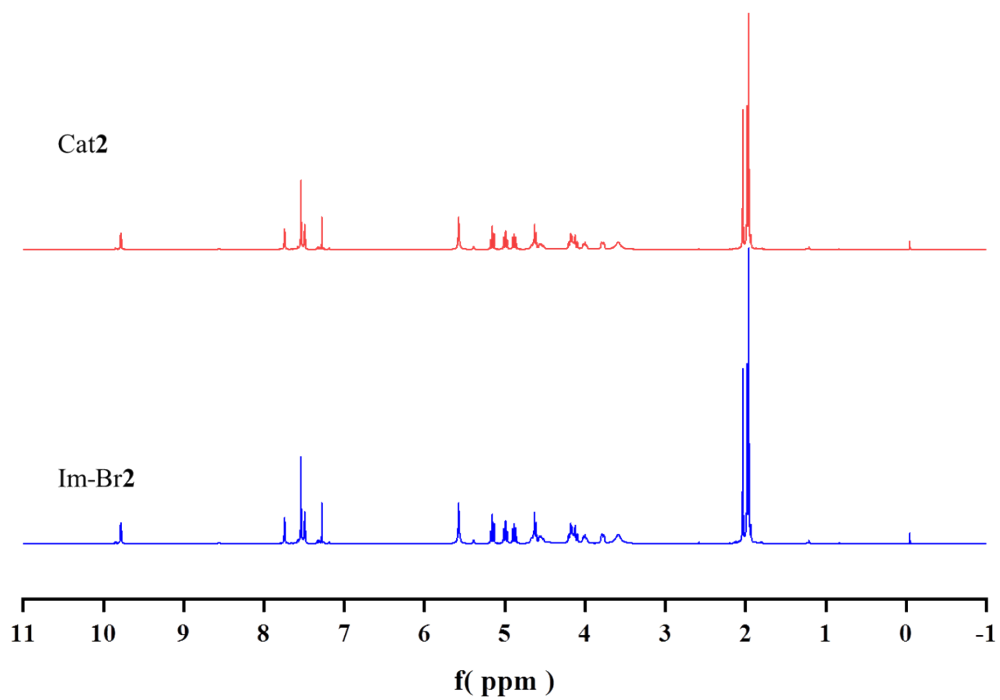

Fig. S3 <sup>1</sup>H NMR of Cat2/Im-Br2 in CDCl<sub>3</sub>.

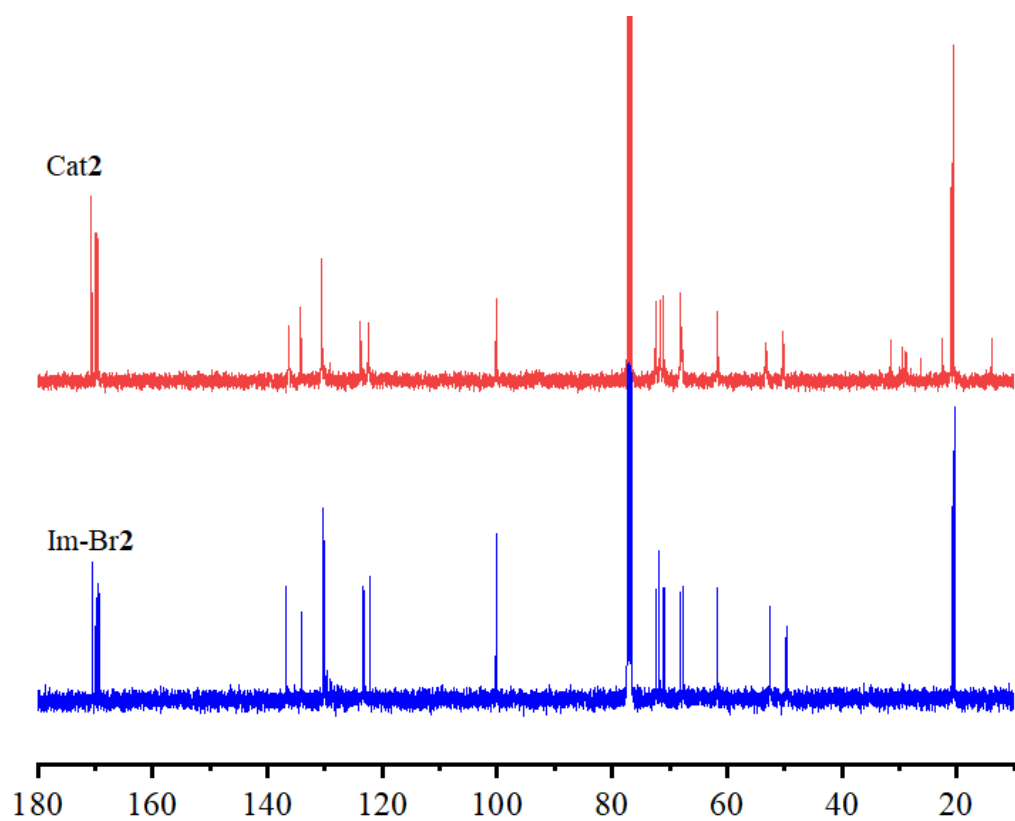

Fig. S4 <sup>13</sup>C NMR of Cat2/Im-Br2 in CDCl<sub>3</sub>.

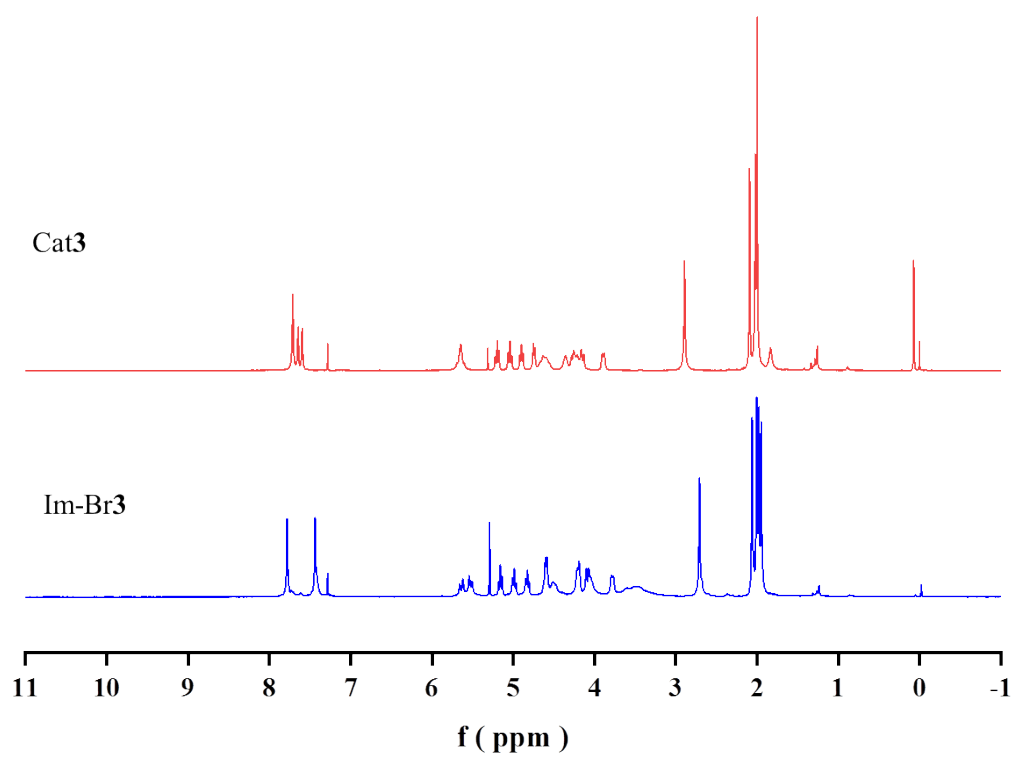

Fig. S5 <sup>1</sup>H NMR of Cat3/Im-Br3 in CDCl<sub>3</sub>.

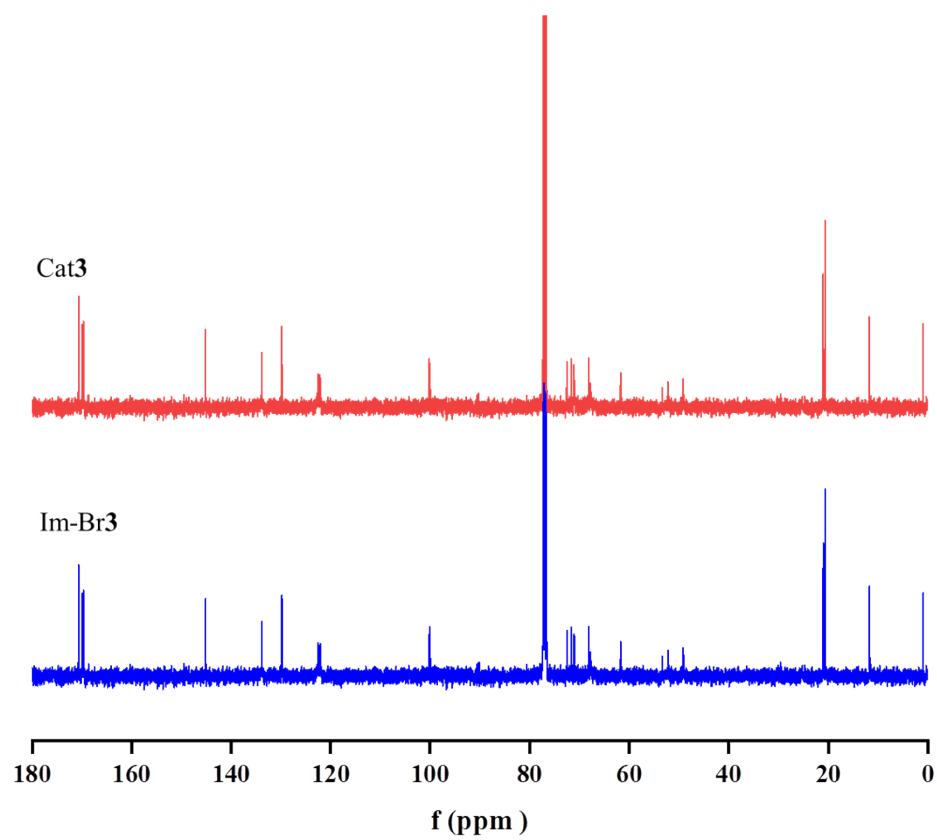

Fig. S6 <sup>13</sup>C NMR of Cat3/Im-Br3 in CDCl<sub>3</sub>.

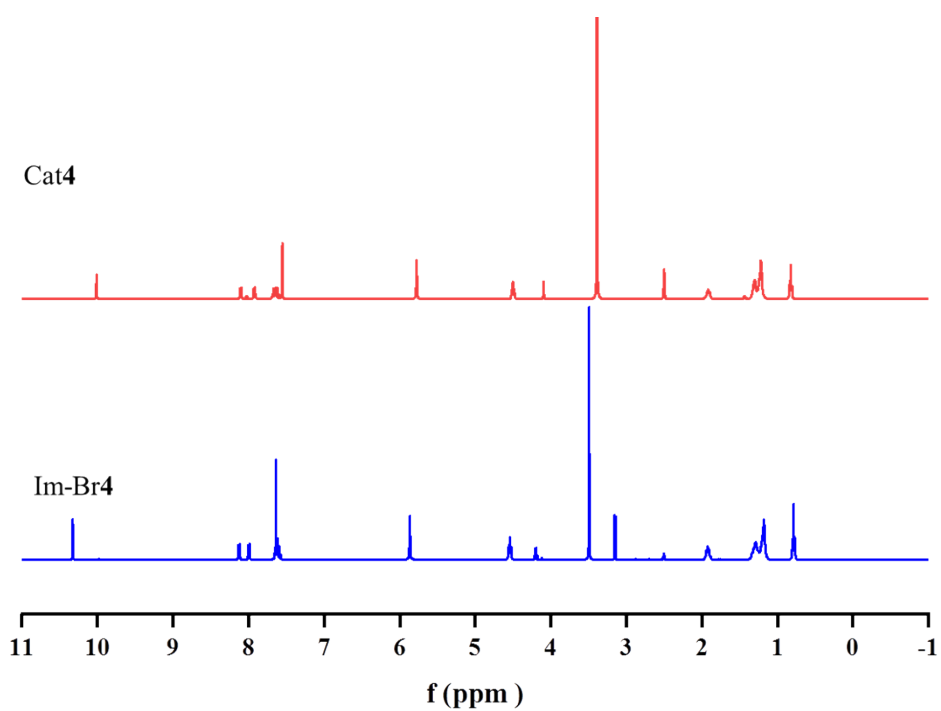

Fig. S7 <sup>1</sup>H NMR of Cat4/Im-Br4 in DMSO-*d*<sub>6</sub>.

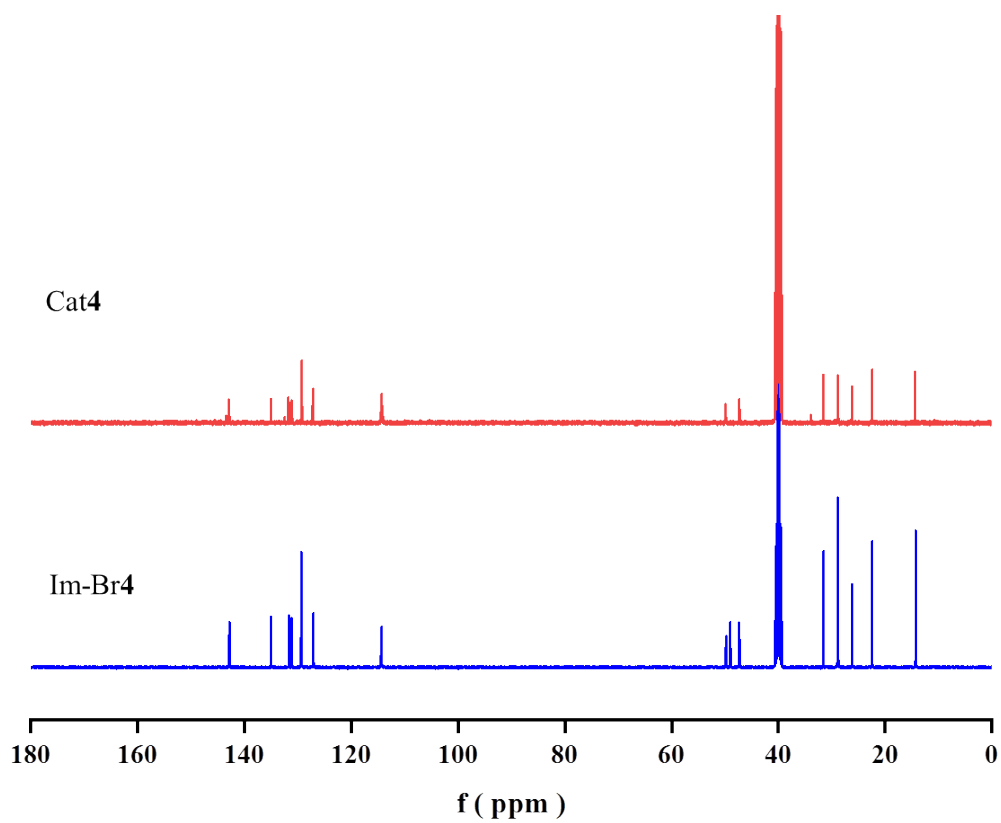

Fig. S8 <sup>13</sup>C NMR of Cat4/Im-Br4 in DMSO-*d*<sub>6</sub>.

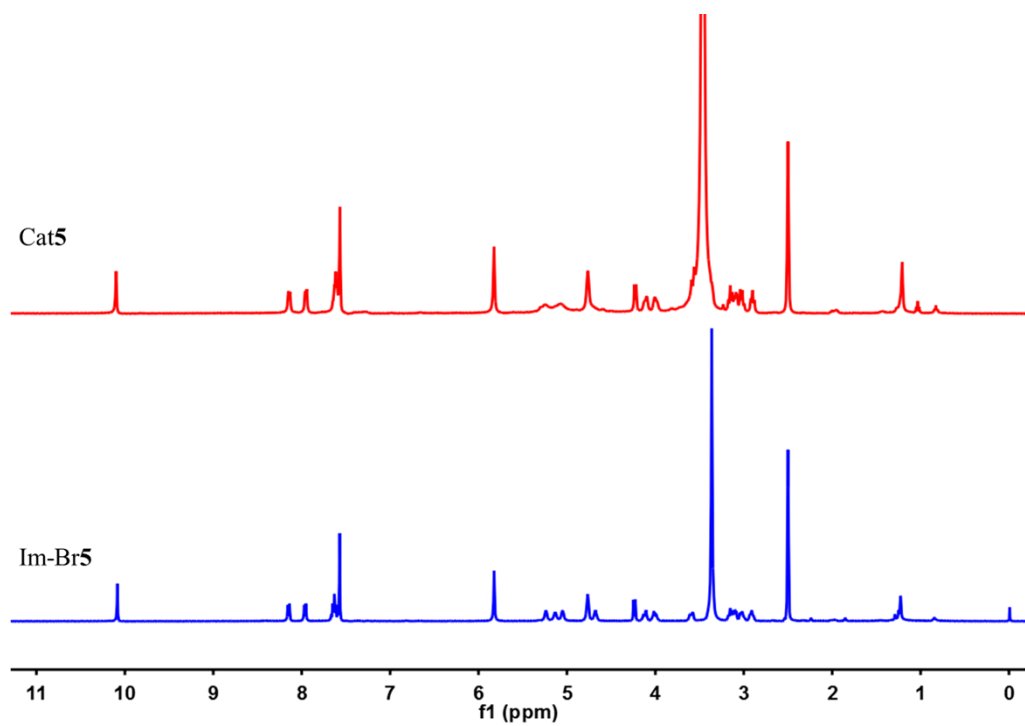

Fig. S9  $^1\text{H}$  NMR of Cat5/Im-Br5 in  $\text{DMSO-}d_6$ .

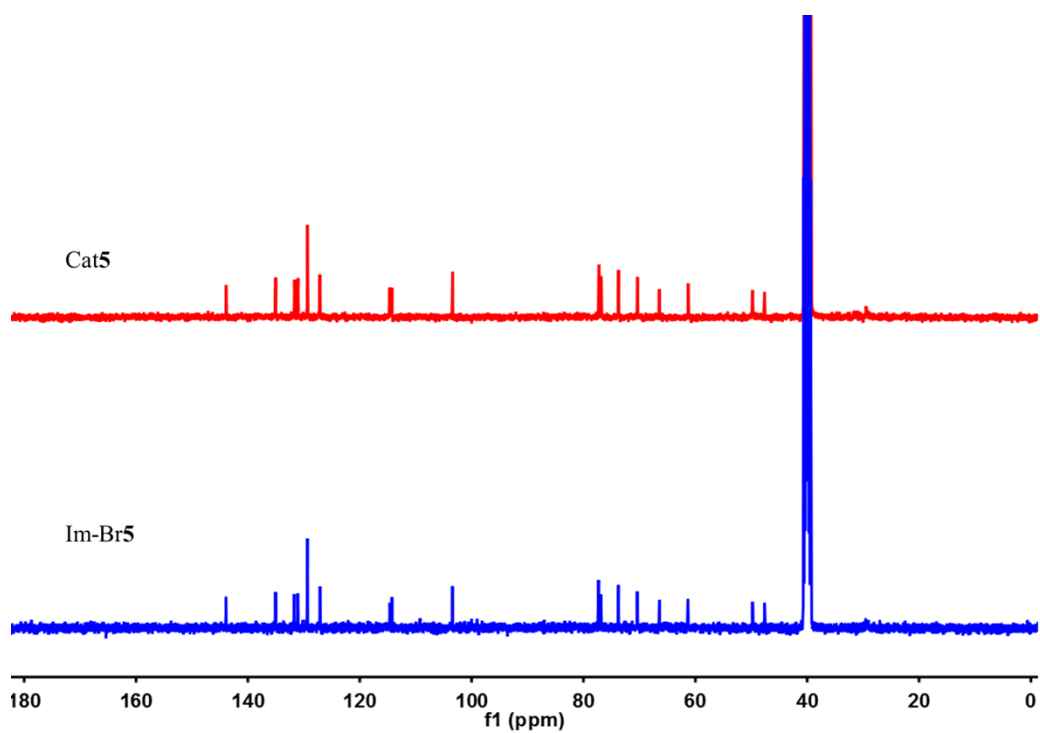

Fig. S10  $^{13}\text{C}$  NMR of Cat5/Im-Br5 in  $\text{DMSO-}d_6$ .

### 3.2 Comparative FT-IR Spectra of Imidazolium Salts

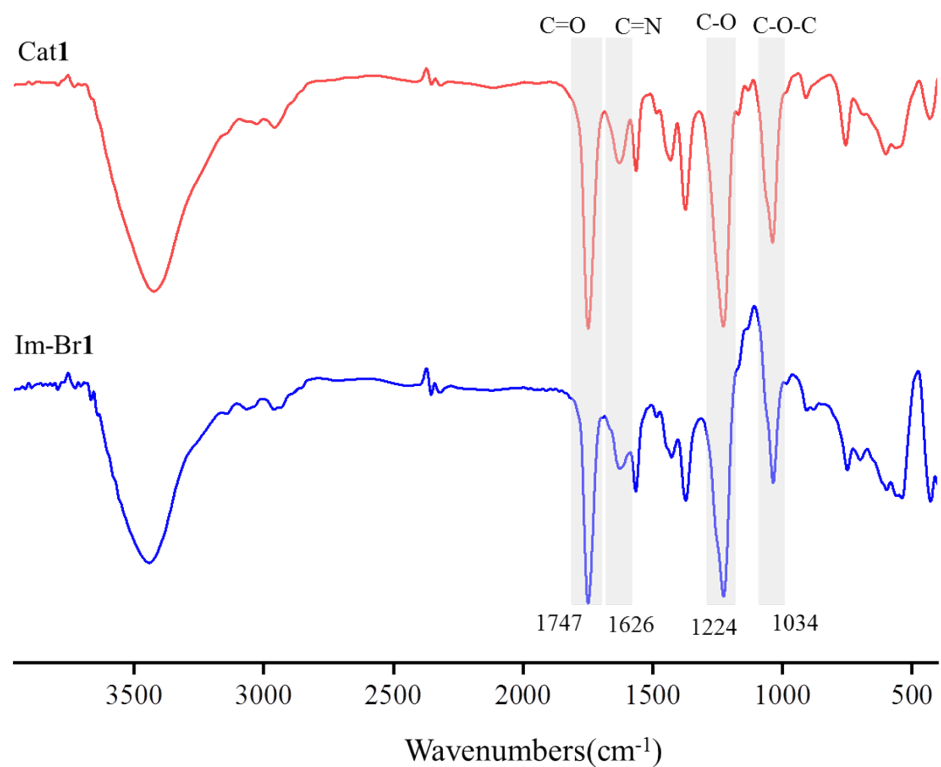

Fig. S11 FT-IR of Cat1/Im-Br1.

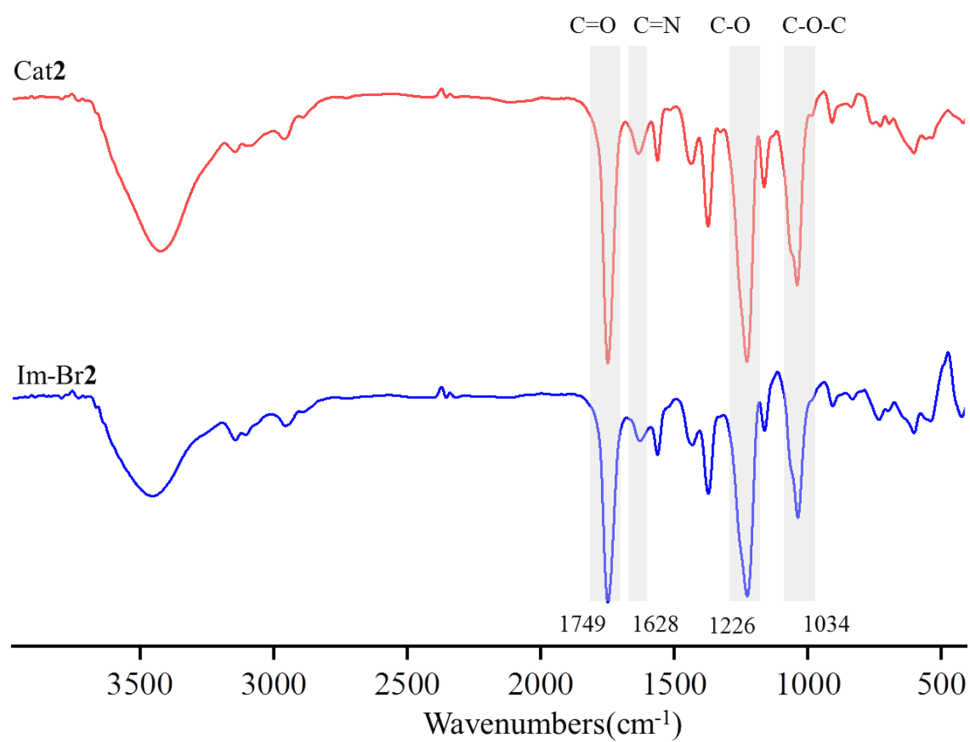

Fig. S12 FT-IR of Cat2/Im-Br2.



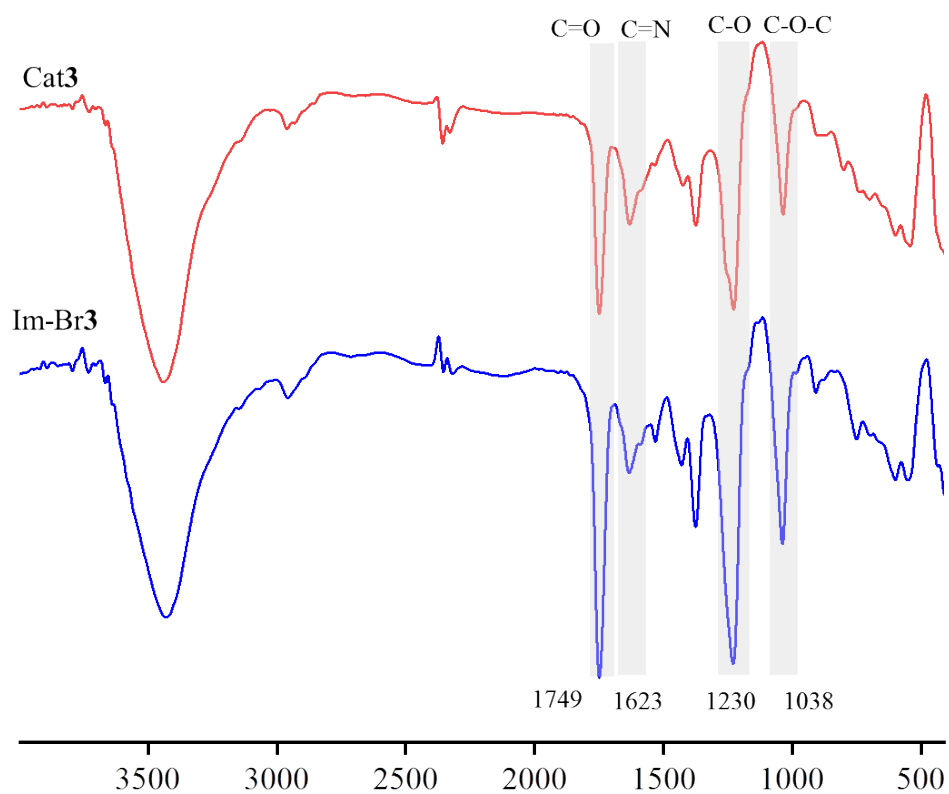

Fig. S13 FT-IR of Cat3/Im-Br3.

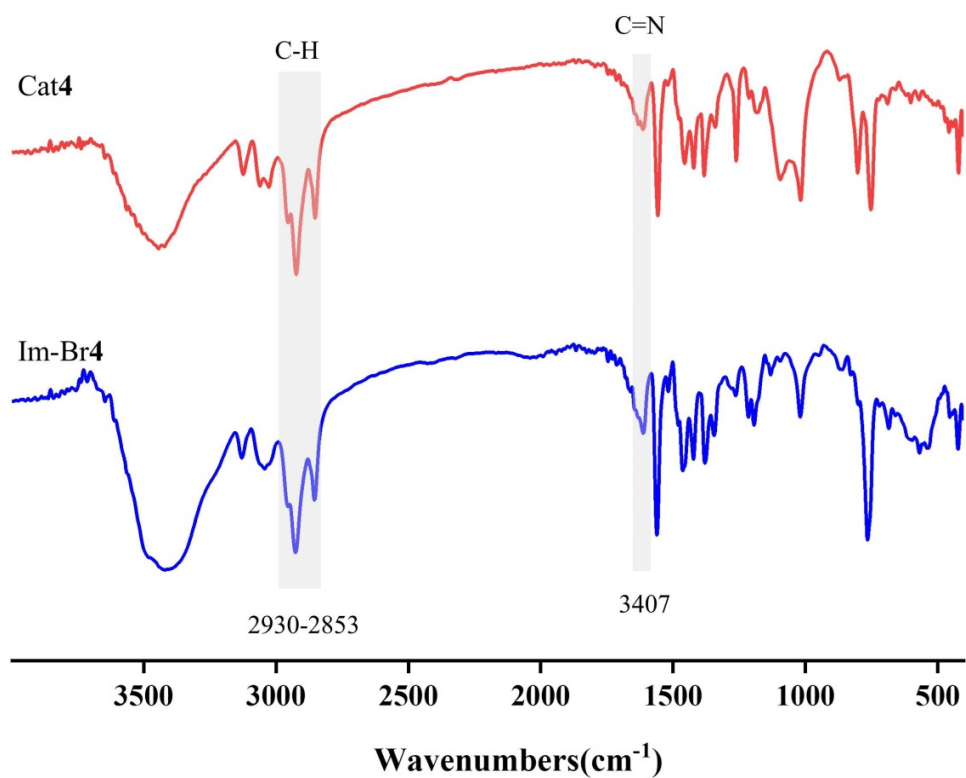

Fig. S14 FT-IR of Cat4/Im-Br4.

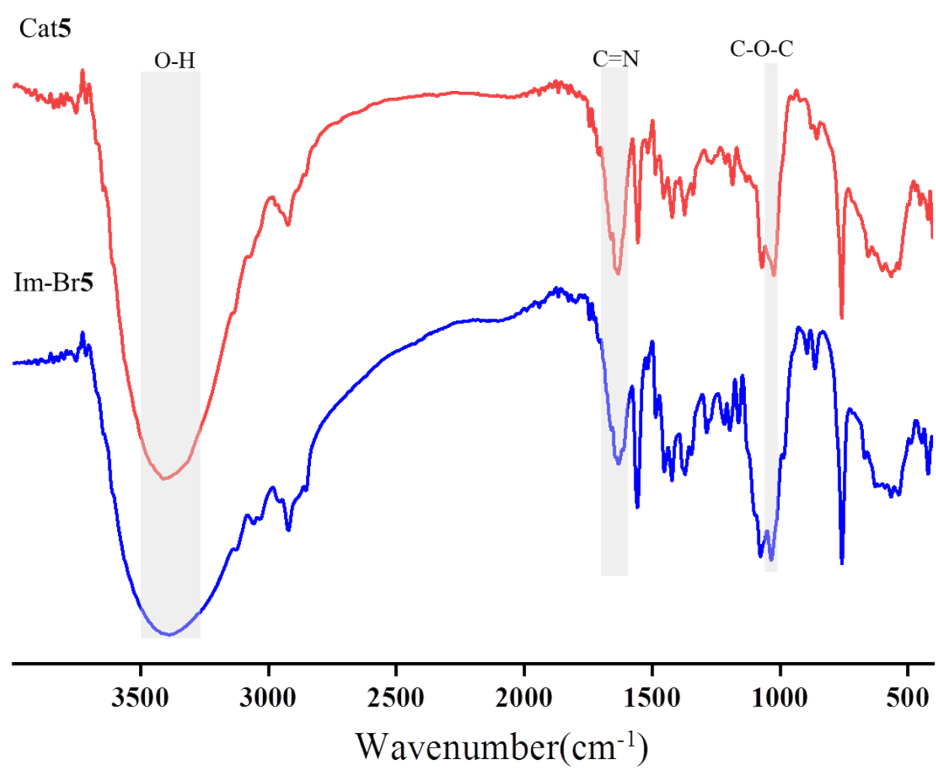

Fig. S15 FT-IR of Cat5/Im-Br5.

### 3.3 HR-MS Spectra of Imidazolium Salts

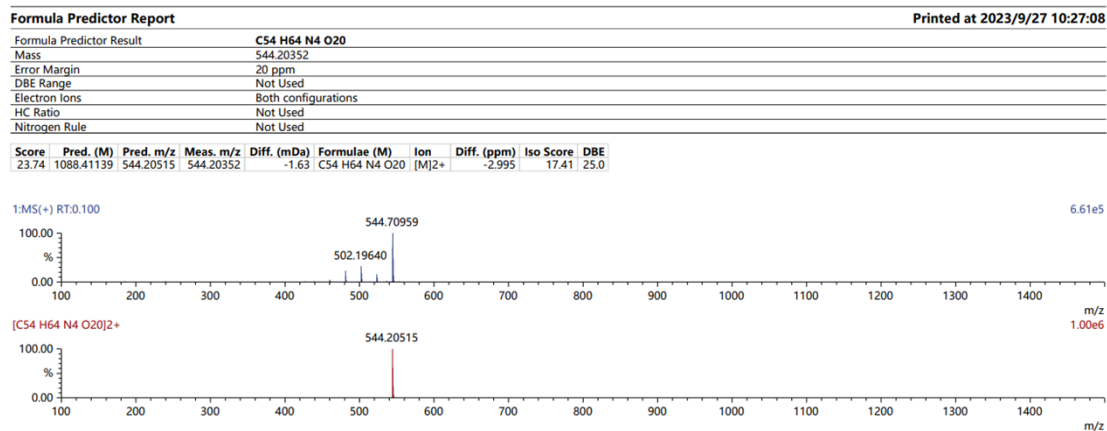

Fig. S16 HR/LC-MS of Im-Br1.

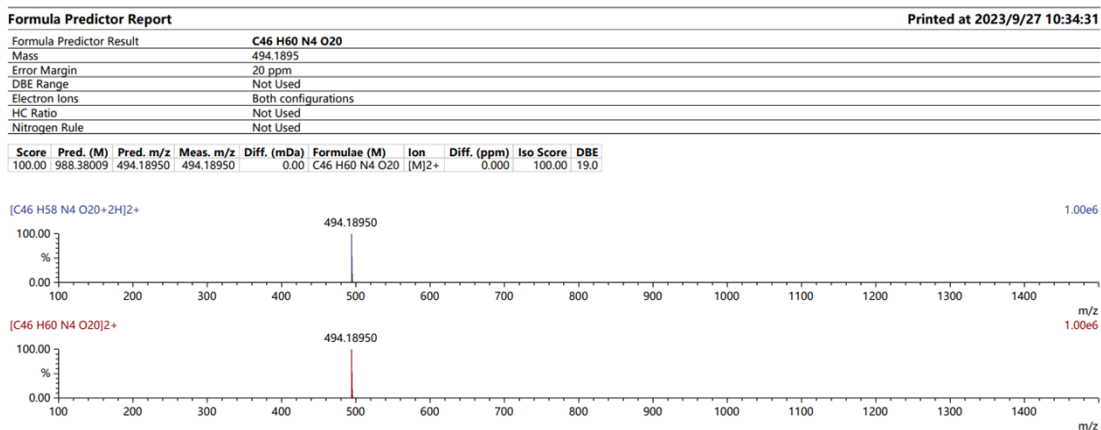

Fig. S17 HR/LC-MS of Im-Br2.

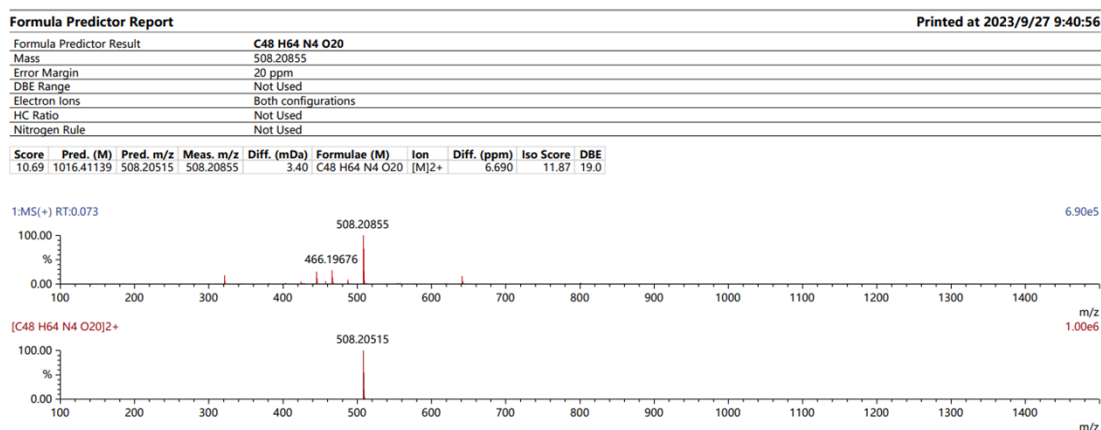

Fig. S18 HR/LC-MS of Im-Br3.

### Formula Predictor Report

Printed at 2022/11/9 10:42:39

| Formula Predictor Result |                     | C38 H52 N4 |  |
|--------------------------|---------------------|------------|--|
| Mass                     | 282.21105           |            |  |
| Error Margin             | 10 ppm              |            |  |
| DBE Range                | Not Used            |            |  |
| Electron Ions            | Both configurations |            |  |
| HC Ratio                 | Not Used            |            |  |
| Nitrogen Rule            | Not Used            |            |  |

| # | Score | Pred. (M) | Pred. m/z | Meas. m/z | Diff. (mDa) | Formulae (M) | Ion   | Diff. (ppm) | Iso Score | DBE  |
|---|-------|-----------|-----------|-----------|-------------|--------------|-------|-------------|-----------|------|
| 6 | 38.58 | 564.41920 | 282.20905 | 282.21105 | 2.00        | C38 H52 N4   | [M]2+ | 7.087       | 42.87     | 15.0 |

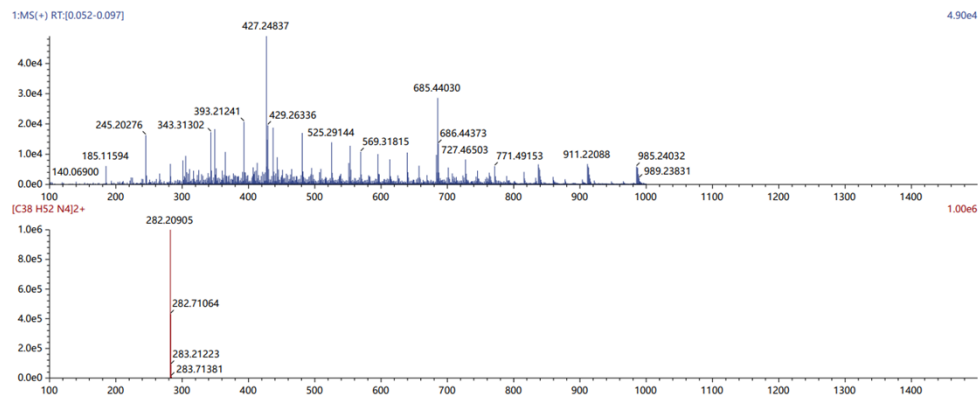

Fig. S19 HR/LC-MS of Im-Br4.

### Formula Predictor Report

Printed at 2023/9/27 10:11:21

| Formula Predictor Result |                     | C38 H48 N4 O12 |  |
|--------------------------|---------------------|----------------|--|
| Mass                     | 376.16494           |                |  |
| Error Margin             | 20 ppm              |                |  |
| DBE Range                | Not Used            |                |  |
| Electron Ions            | Both configurations |                |  |
| HC Ratio                 | Not Used            |                |  |
| Nitrogen Rule            | Not Used            |                |  |

| Score | Pred. (M) | Pred. m/z | Meas. m/z | Diff. (mDa) | Formulae (M)   | Ion   | Diff. (ppm) | Iso Score | DBE  |
|-------|-----------|-----------|-----------|-------------|----------------|-------|-------------|-----------|------|
| 34.90 | 752.32687 | 376.16289 | 376.16494 | 2.05        | C38 H48 N4 O12 | [M]2+ | 5.450       | 38.77     | 17.0 |

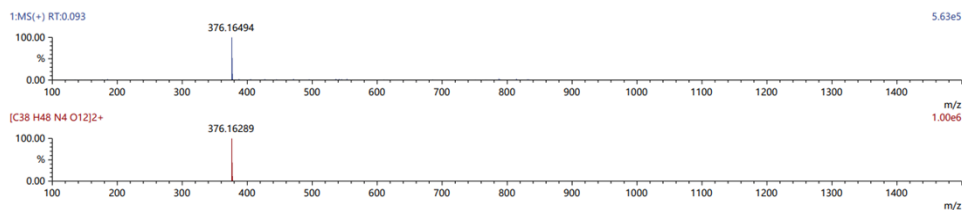

Fig. S20 HR/LC-MS of Im-Br5.

### Formula Predictor Report

Printed at 2022/10/13 18:14:42

| Formula Predictor Result |                     | C54 H64 N4 O20 |  |
|--------------------------|---------------------|----------------|--|
| Mass                     | 544.20901           |                |  |
| Error Margin             | 10 ppm              |                |  |
| DBE Range                | Not Used            |                |  |
| Electron Ions            | Both configurations |                |  |
| HC Ratio                 | Not Used            |                |  |
| Nitrogen Rule            | Not Used            |                |  |

| # | Score | Pred. (M)  | Pred. m/z | Meas. m/z | Diff. (mDa) | Formulae (M)   | Ion   | Diff. (ppm) | Iso Score | DBE  |
|---|-------|------------|-----------|-----------|-------------|----------------|-------|-------------|-----------|------|
| 1 | 40.00 | 1088.41139 | 544.20515 | 544.20901 | 3.86        | C54 H64 N4 O20 | [M]2+ | 7.093       | 44.44     | 25.0 |

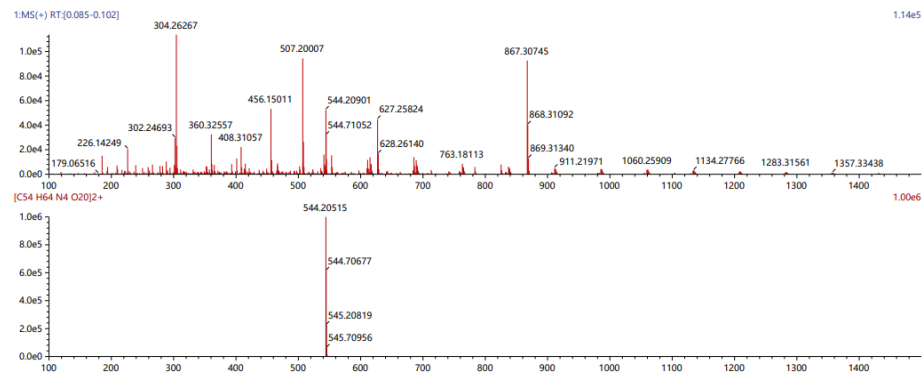

Fig. S21 HR/LC-MS of Cat1.

**Formula Predictor Report** Printed at 2022/10/13 18:11:46

|                          |                     |                       |  |
|--------------------------|---------------------|-----------------------|--|
| Formula Predictor Result |                     | <b>C46 H60 N4 O20</b> |  |
| Mass                     | 494.19304           |                       |  |
| Error Margin             | 10 ppm              |                       |  |
| DBE Range                | Not Used            |                       |  |
| Electron Ions            | Both configurations |                       |  |
| HC Ratio                 | Not Used            |                       |  |
| Nitrogen Rule            | Not Used            |                       |  |

| # | Score | Pred. (M) | Pred. m/z | Meas. m/z | Diff. (mDa) | Formulae (M)   | Ion               | Diff. (ppm) | Iso Score | DBE  |
|---|-------|-----------|-----------|-----------|-------------|----------------|-------------------|-------------|-----------|------|
| 1 | 36.95 | 988.38009 | 494.18950 | 494.19304 | 3.54        | C46 H60 N4 O20 | [M] <sup>2+</sup> | 7.163       | 41.05     | 19.0 |

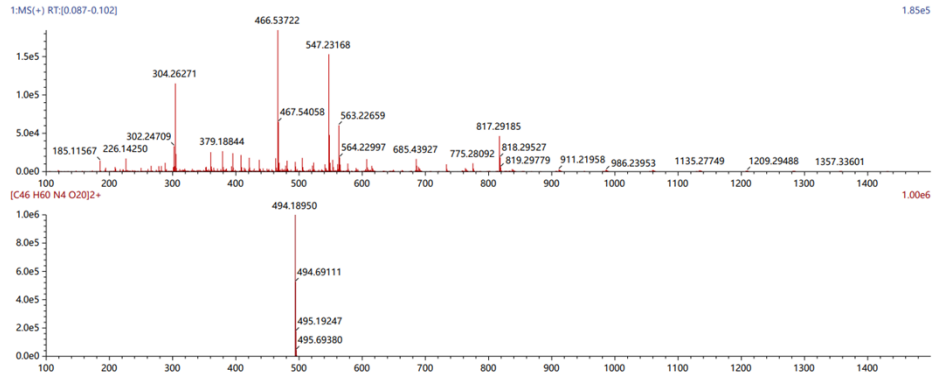

Fig. S22 HR/LC-MS of Cat2.

**Formula Predictor Report** Printed at 2022/10/13 18:36:19

|                          |                     |                       |  |
|--------------------------|---------------------|-----------------------|--|
| Formula Predictor Result |                     | <b>C48 H64 N4 O20</b> |  |
| Mass                     | 508.20871           |                       |  |
| Error Margin             | 10 ppm              |                       |  |
| DBE Range                | Not Used            |                       |  |
| Electron Ions            | Both configurations |                       |  |
| HC Ratio                 | Not Used            |                       |  |
| Nitrogen Rule            | Not Used            |                       |  |

| # | Score | Pred. (M)  | Pred. m/z | Meas. m/z | Diff. (mDa) | Formulae (M)   | Ion               | Diff. (ppm) | Iso Score | DBE  |
|---|-------|------------|-----------|-----------|-------------|----------------|-------------------|-------------|-----------|------|
| 1 | 40.00 | 1016.41139 | 508.20515 | 508.20871 | 3.56        | C48 H64 N4 O20 | [M] <sup>2+</sup> | 7.005       | 44.44     | 19.0 |

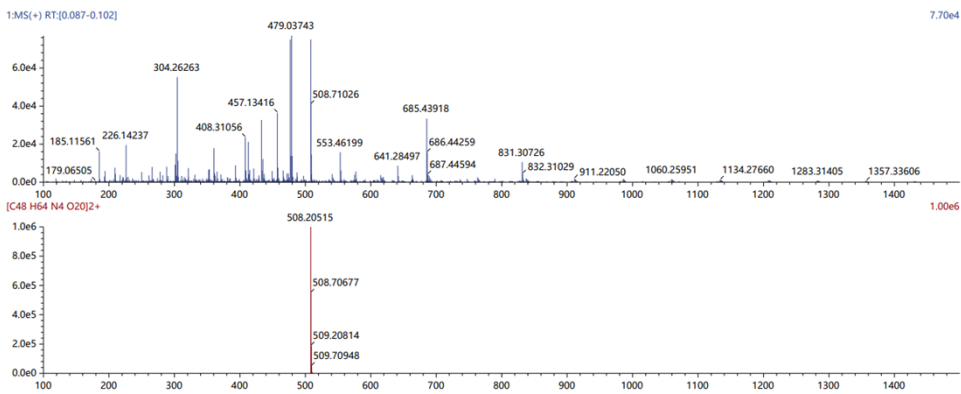

Fig. S23 HR/LC-MS of Cat3.

**Formula Predictor Report**

Printed at 2022/10/13 17:40:37

|                          |                     |                   |  |
|--------------------------|---------------------|-------------------|--|
| Formula Predictor Result |                     | <b>C38 H52 N4</b> |  |
| Mass                     | 282.21053           |                   |  |
| Error Margin             | 10 ppm              |                   |  |
| DBE Range                | Not Used            |                   |  |
| Electron Ions            | Both configurations |                   |  |
| HC Ratio                 | Not Used            |                   |  |
| Nitrogen Rule            | Not Used            |                   |  |

| # | Score | Pred. (M) | Pred. m/z | Meas. m/z | Diff. (mDa) | Formulae (M) | Ion   | Diff. (ppm) | Iso Score | DBE  |
|---|-------|-----------|-----------|-----------|-------------|--------------|-------|-------------|-----------|------|
| 3 | 39.76 | 564.41920 | 282.20905 | 282.21053 | 1.48        | C38 H52 N4   | [M]2+ | 5.244       | 44.18     | 15.0 |

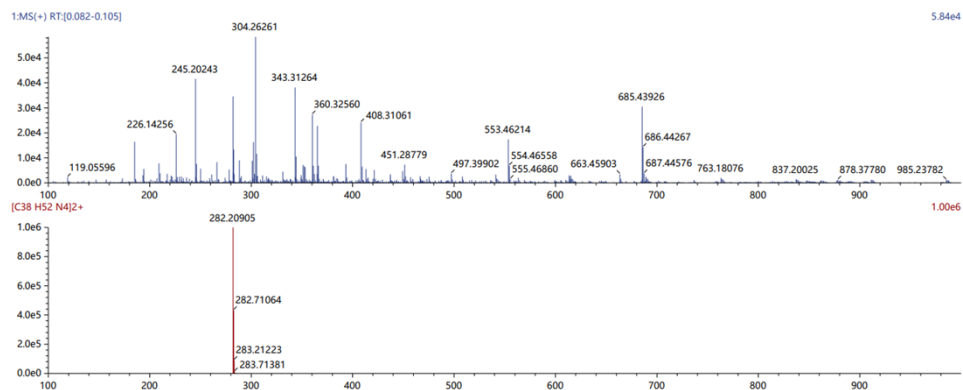

Fig. S24 HR/LC-MS of Cat4.

**Formula Predictor Report**

Printed at 2023/9/27 10:00:50

|                          |                     |                       |  |
|--------------------------|---------------------|-----------------------|--|
| Formula Predictor Result |                     | <b>C38 H48 N4 O12</b> |  |
| Mass                     | 376.16457           |                       |  |
| Error Margin             | 20 ppm              |                       |  |
| DBE Range                | Not Used            |                       |  |
| Electron Ions            | Both configurations |                       |  |
| HC Ratio                 | Not Used            |                       |  |
| Nitrogen Rule            | Not Used            |                       |  |

| Score | Pred. (M) | Pred. m/z | Meas. m/z | Diff. (mDa) | Formulae (M)   | Ion   | Diff. (ppm) | Iso Score | DBE  |
|-------|-----------|-----------|-----------|-------------|----------------|-------|-------------|-----------|------|
| 24.46 | 752.32687 | 376.16289 | 376.16457 | 1.68        | C38 H48 N4 O12 | [M]2+ | 4.466       | 21.25     | 17.0 |

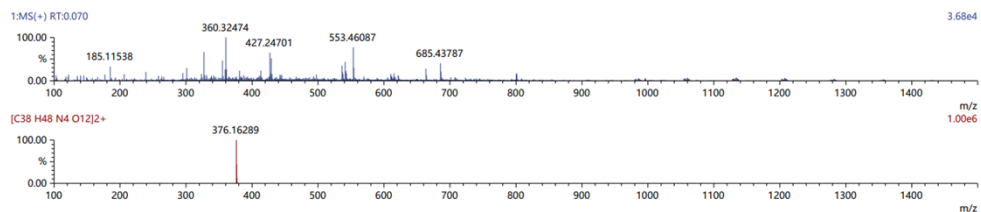

Fig. S25 HR/LC-MS of Cat5.

### 3.4 XPS Spectra of Cat1 and Cat5

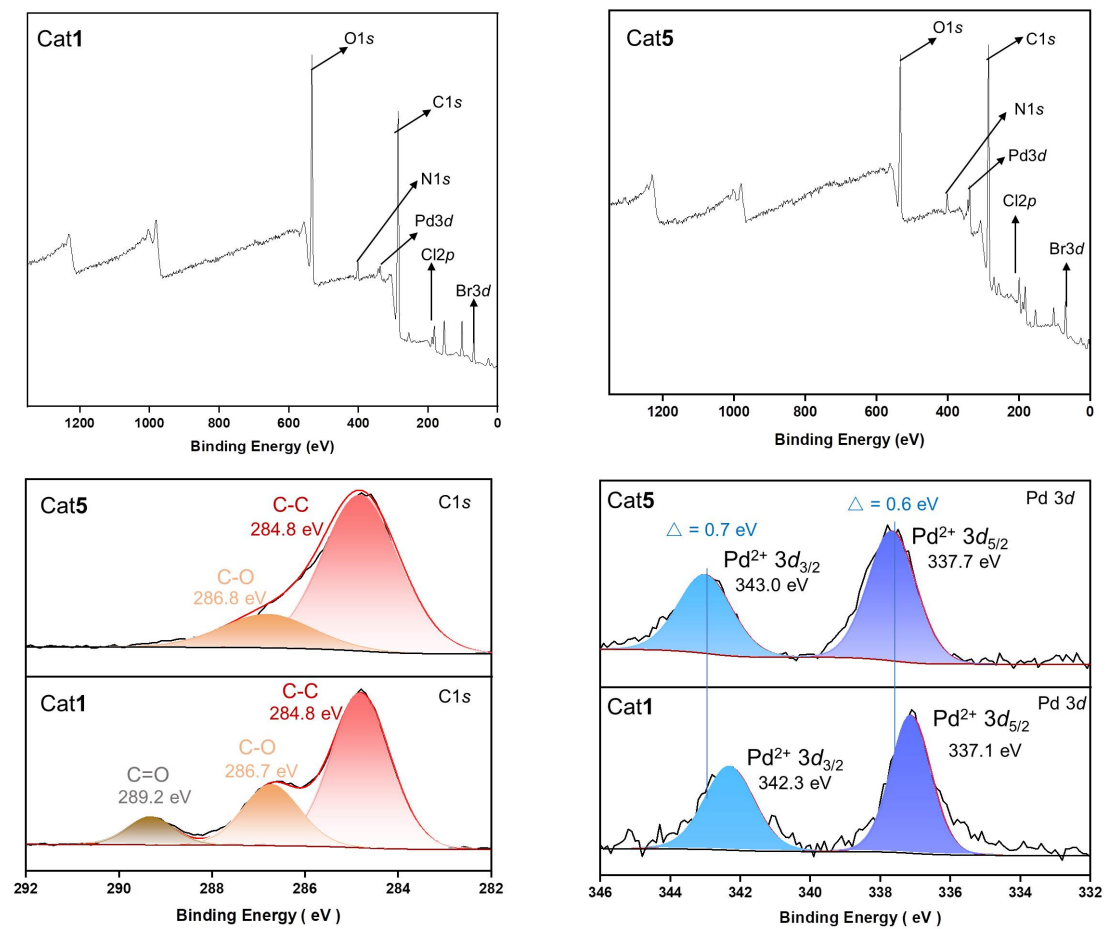

Fig. S26 XPS spectra of Cat1 and Cat5.

### 3.5 TGA Spectra of Cat1-5

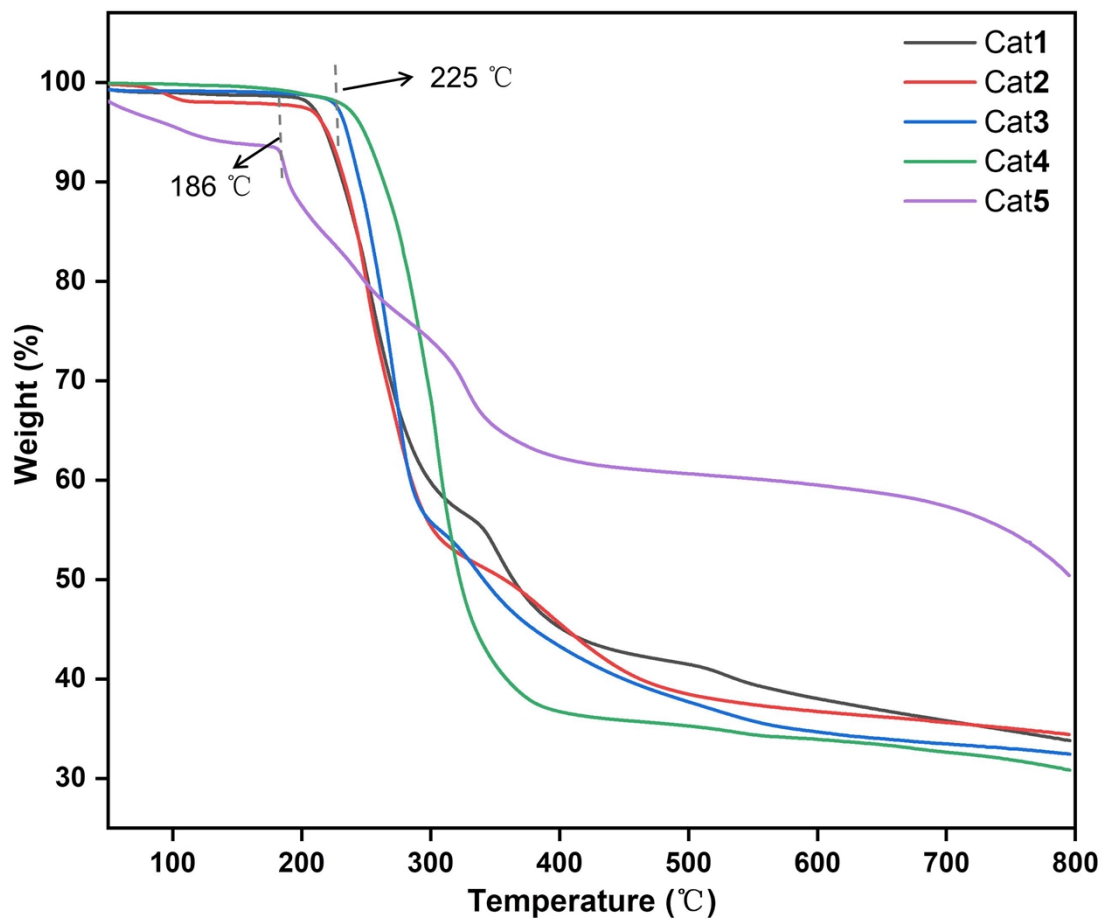

Fig. S27 TGA spectra of Cat1-5.



### 3.6 NMR Spectra and Color of Cat1 at Different Temperatures

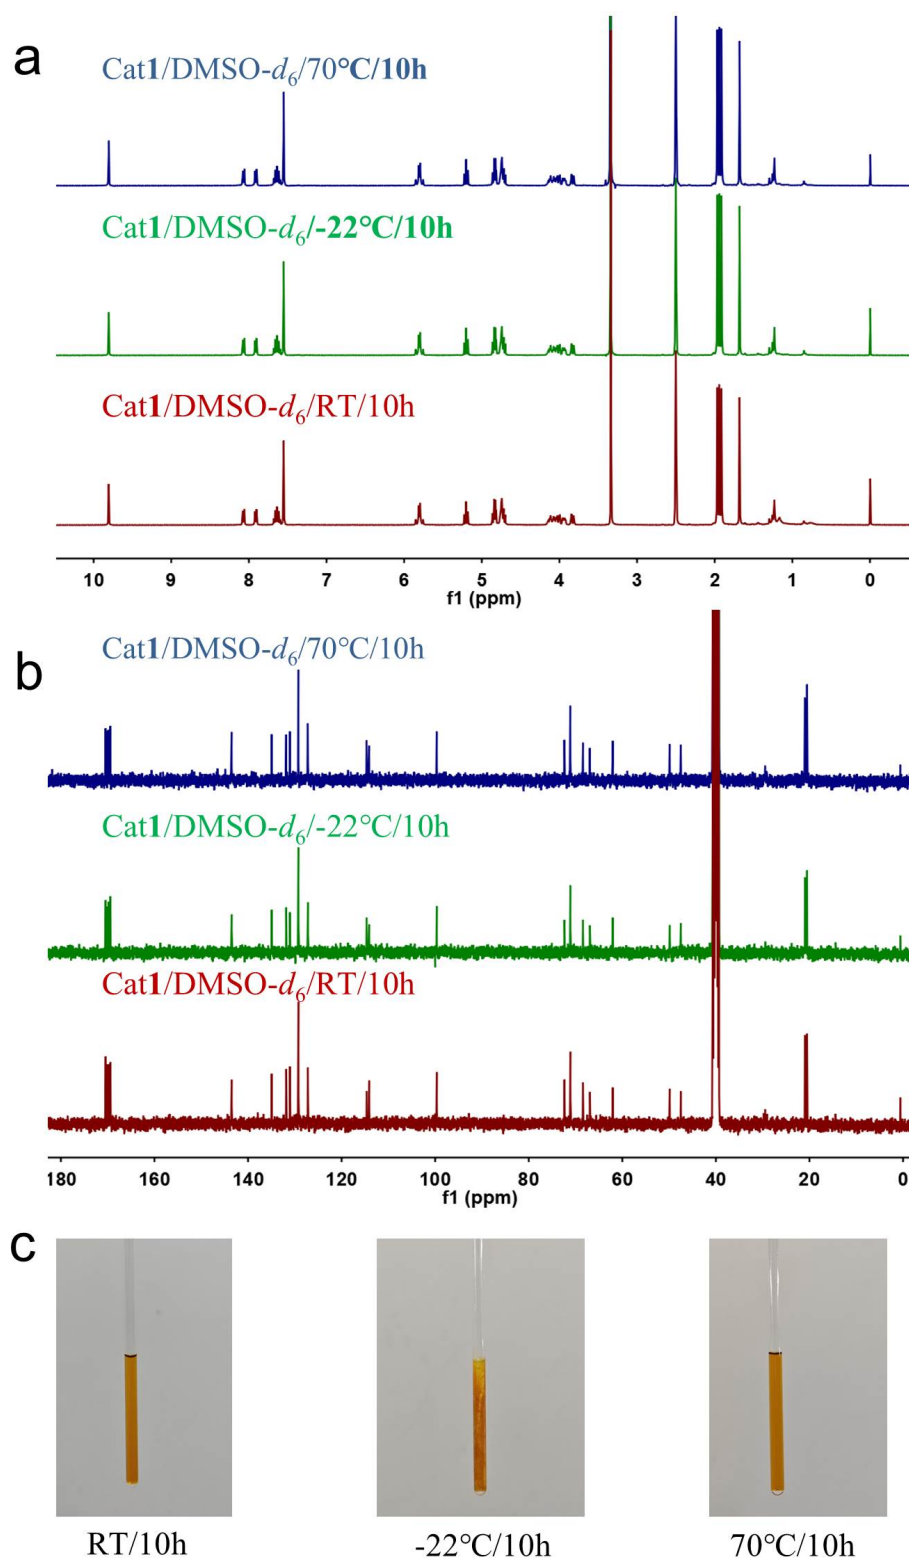

Fig. S28 NMR spectra (a and b) and color (c) of Cat1 in DMSO- $d_6$  at -22°C, 25-30°C, and 70°C.

## 4. Kinetic Experiments

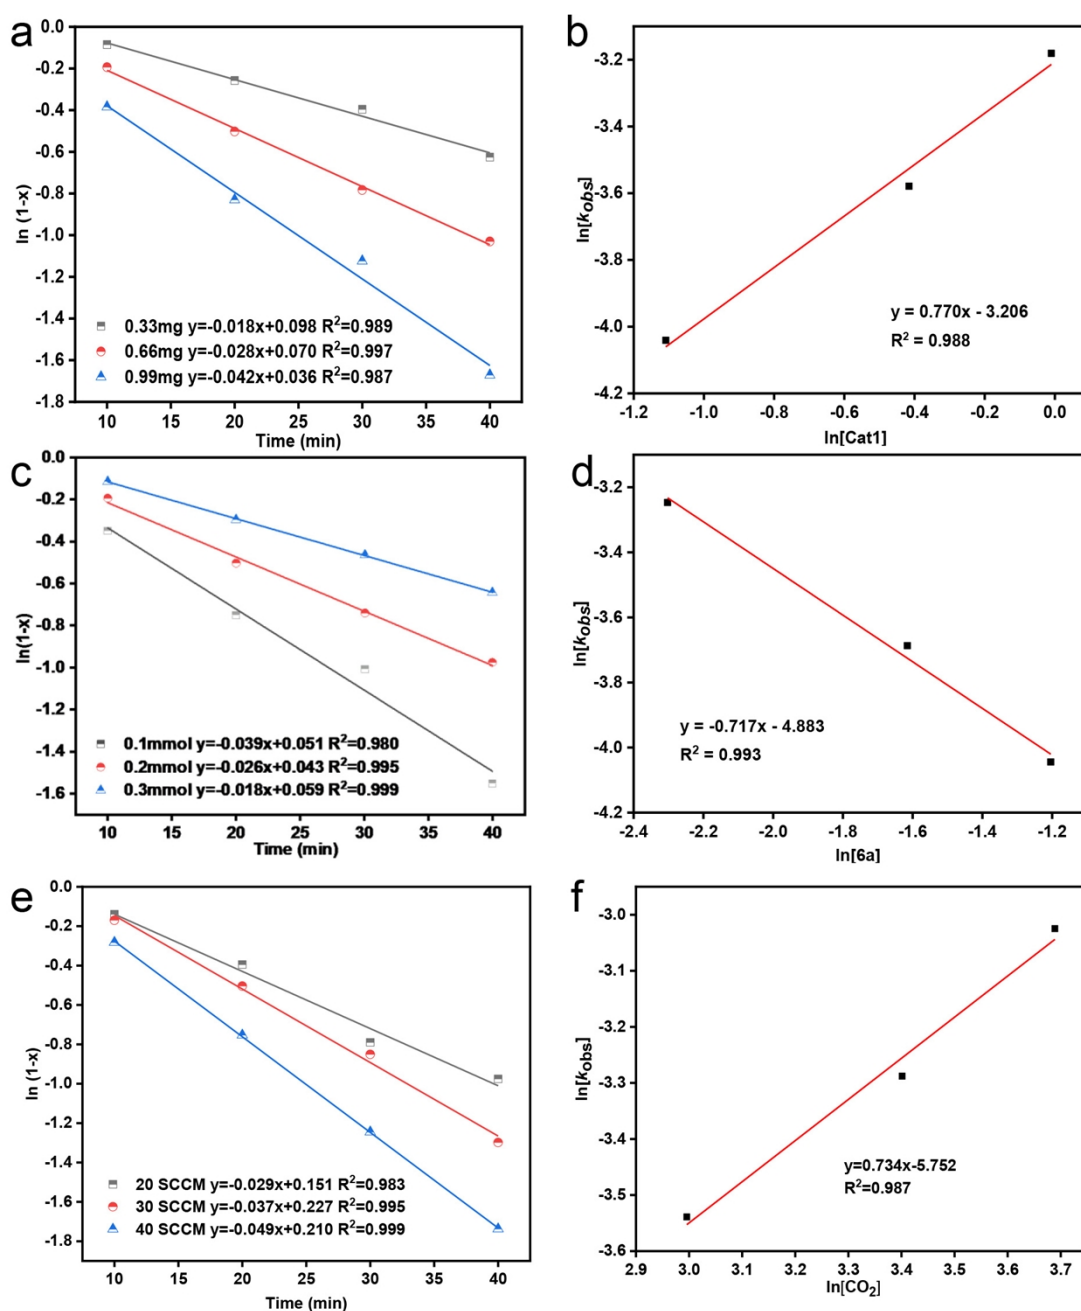

Fig. S29 a Pseudo-first order kinetic plots ( $\ln(1-x)$  versus time) of three different dosages of Cat1. b Curve fitting of  $\ln[k_{obs}]$  against  $\ln[Cat1]$ . c Pseudo-first order kinetic plots  $\ln(1-x)$  versus time of three different concentrations of 6a. d Curve fitting of  $\ln[k_{obs}]$  against  $\ln[6a]$ ; e Pseudo-first order kinetic plots ( $\ln(1-x)$  versus time) of three different flow rates of CO<sub>2</sub>. f curve fitting of  $\ln[k_{obs}]$  against  $\ln[CO_2]$ .

## 5. Gram-scale Reaction, Product Properties, and $^1\text{H}$ NMR

### Spectra

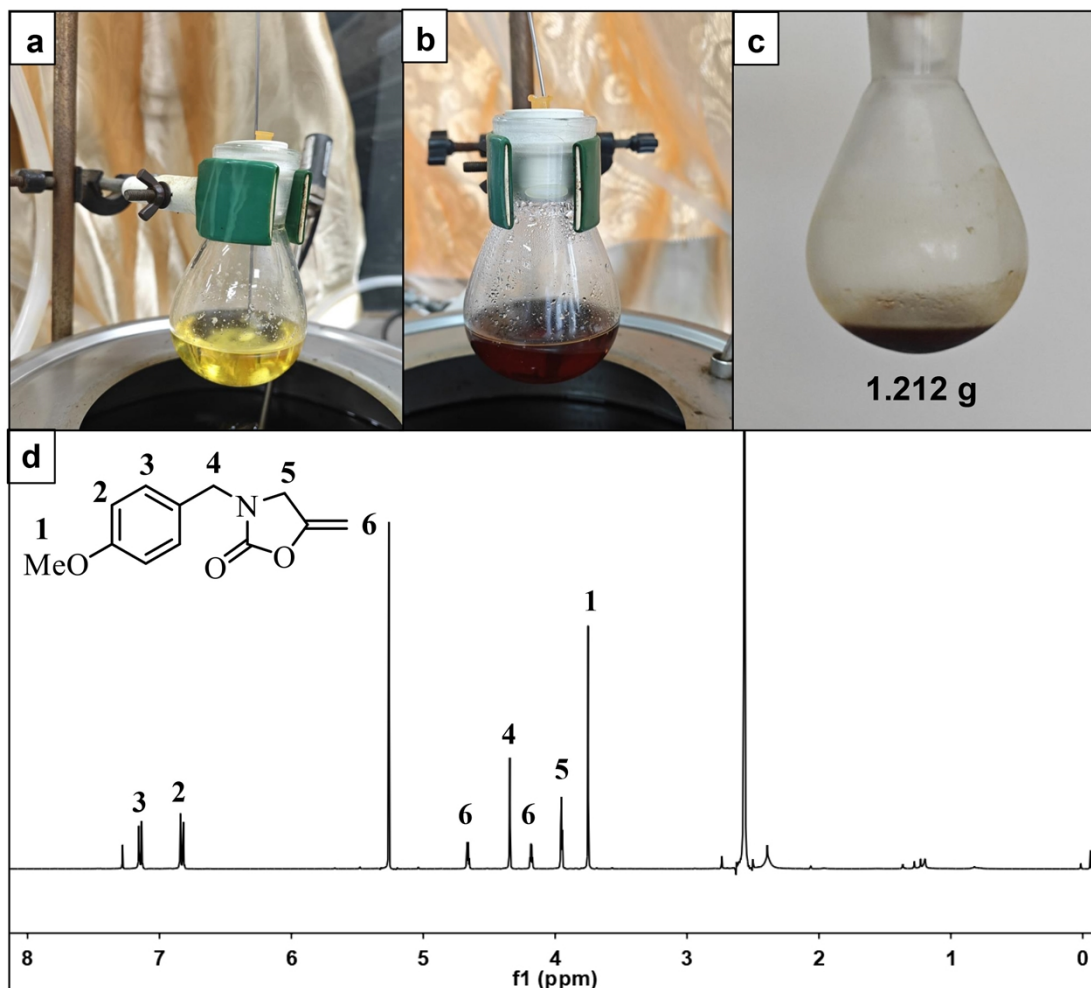

Fig. S30 Gram-scale synthesis. The reactions were carried out with **6a** (6.0 mmol, 1.05 g), Cat1 (5.0 mol%, 6.6 mg), simulated flue gas (bubbling), NaOAc (3.0 mmol, 0.246 g), DMSO (20.0 mL) and stirred at 70 °C for 3.0 h. a System color before reaction; b System color after reaction. c Properties of purified product **7a**. d  $^1\text{H}$  NMR of purified product **7a**.

## 6. Catalyst Stability Evaluation

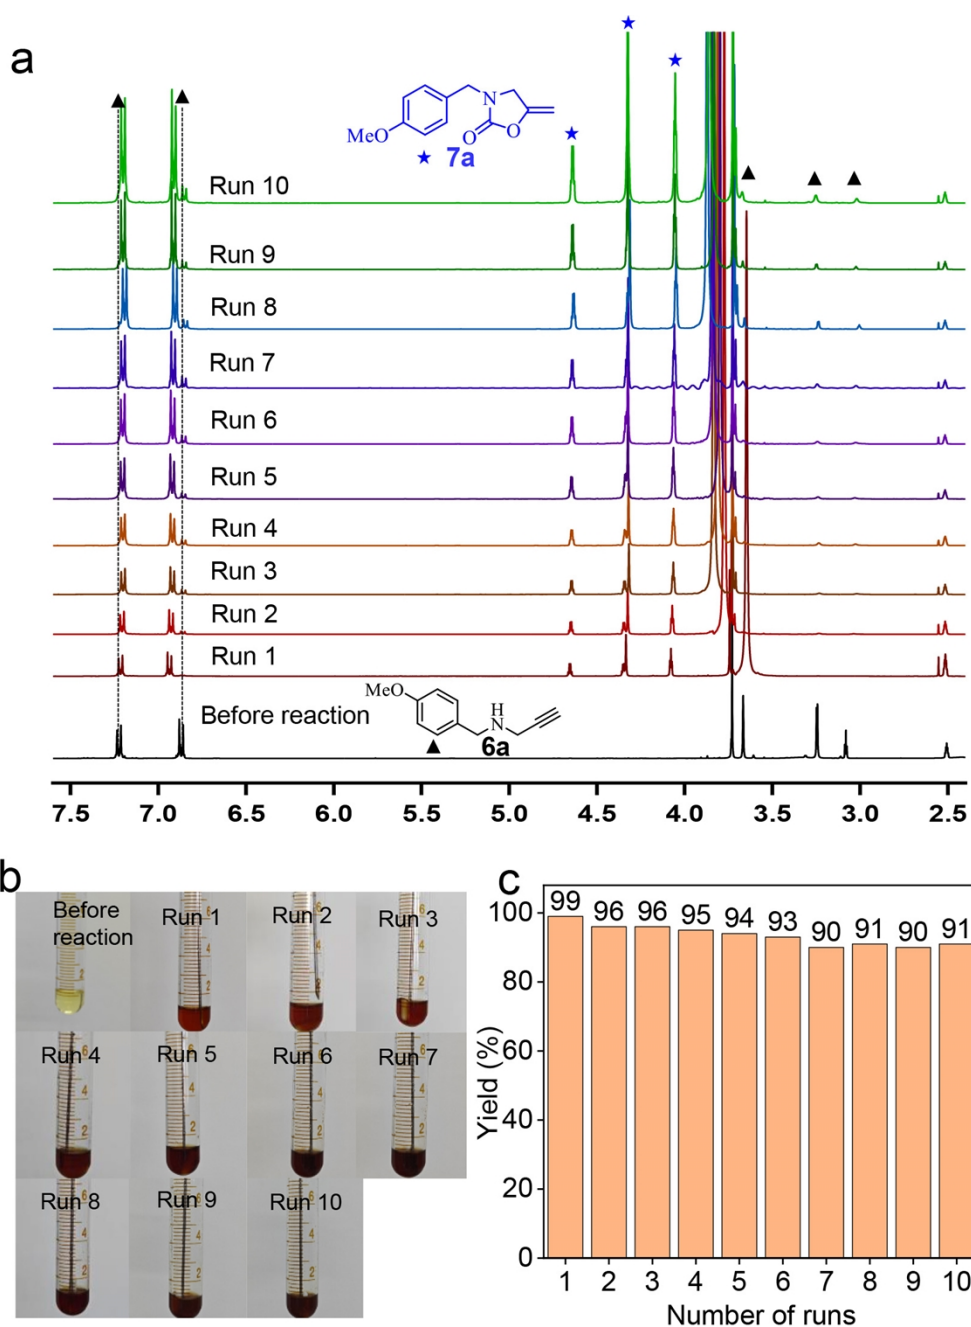

Fig. S31 The cycle catalytic performance of catalyst Cat1. Reaction conditions: **6a** (0.1 mmol, 17.5 mg), Cat1 (0.5 mol%, 0.66 mg), simulated flue gas (bubbling), NaOAc (0.3 mmol, 24.6 mg), DMSO (1.0 mL) and stirred at 70°C for 1.0 h. After each reaction, fresh **6a** was added to the catalytic system. Yields were determined by  $^1\text{H}$  NMR. a Catalyst recycling study for Cat1. b Photos of catalytic system. c  $^1\text{H}$  NMR tracked catalytic system.

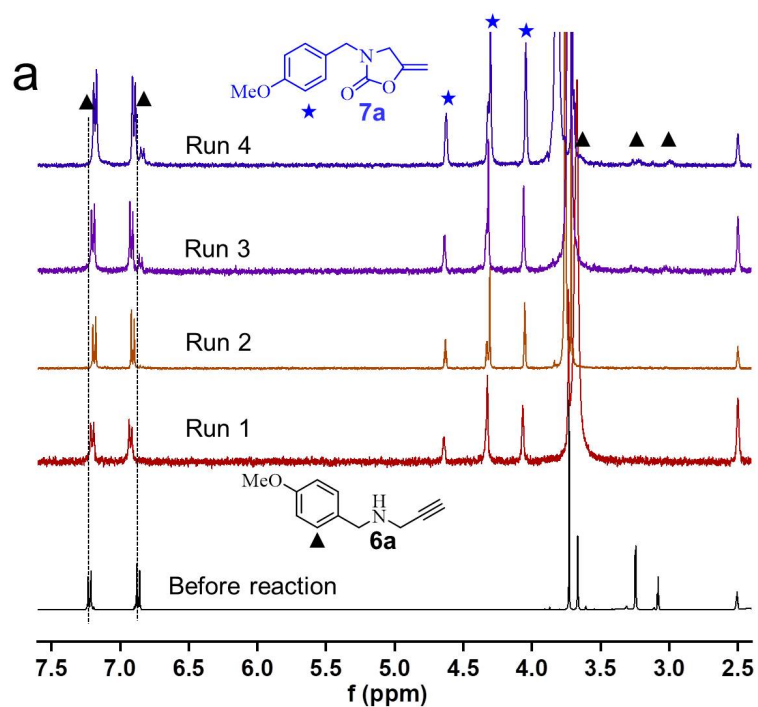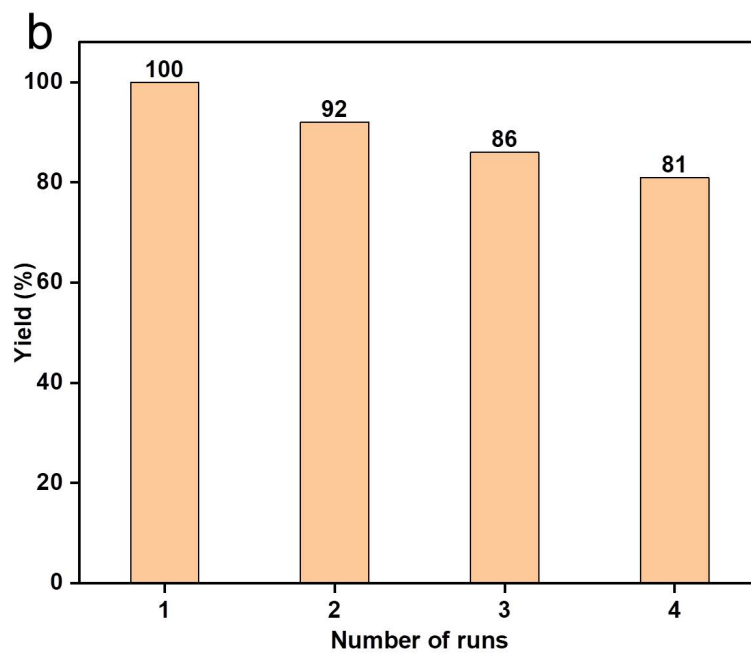

Fig. S32 The cycle catalytic performance of catalyst Cat5. Reaction conditions: **6a** (0.1 mmol, 17.5 mg), Cat5 (0.75 mol%, 0.78 mg), simulated flue gas (bubbling), NaOAc (0.3 mmol, 24.6 mg), DMSO- $d_6$  (1.0 mL) and stirred at 70°C for 1.0 h. After each reaction, fresh **6a** was added to the catalytic system. Yields were determined by  $^1\text{H}$  NMR. a Catalyst recycling study for Cat5. b  $^1\text{H}$  NMR tracked catalytic system.

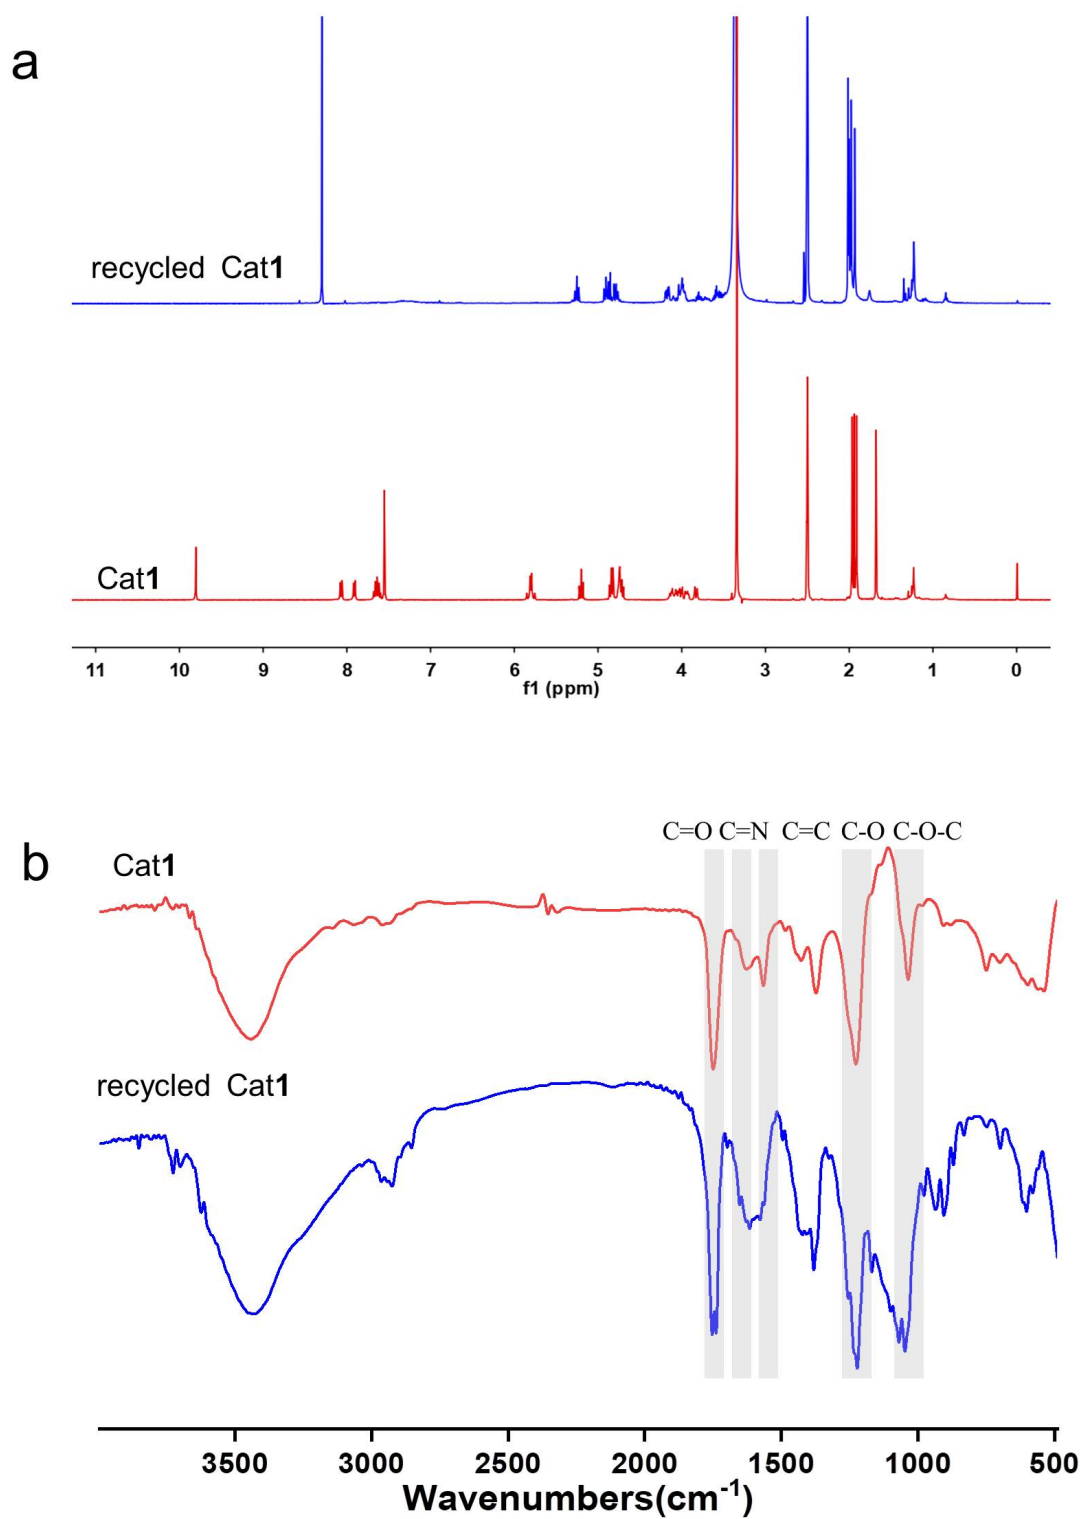

Fig. S33 a  $^1\text{H}$  NMR spectra of Cat1 and recycled Cat1. b FT-IR spectra of Cat1 and recycled Cat1.

## 7. Mechanism Exploration

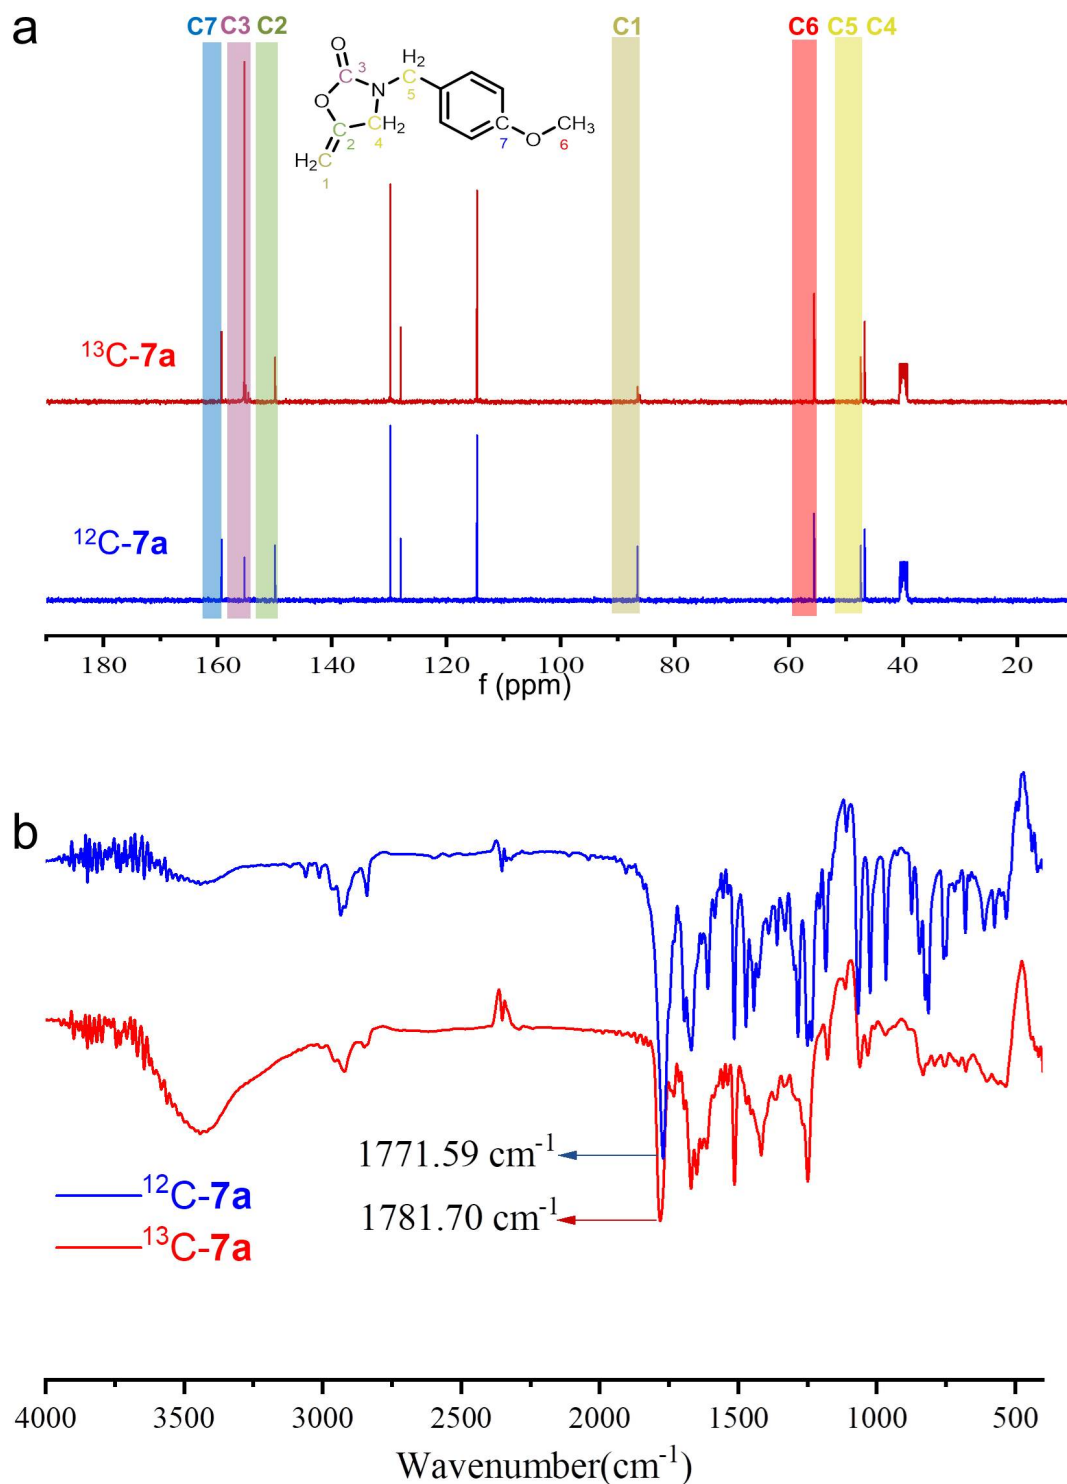

Fig. S34 a <sup>13</sup>C NMR comparison spectra of <sup>13</sup>C-isotope-labeling experiments for **7a**. b FT-IR spectra of <sup>13</sup>C-isotope-labeling experiments for **7a**.

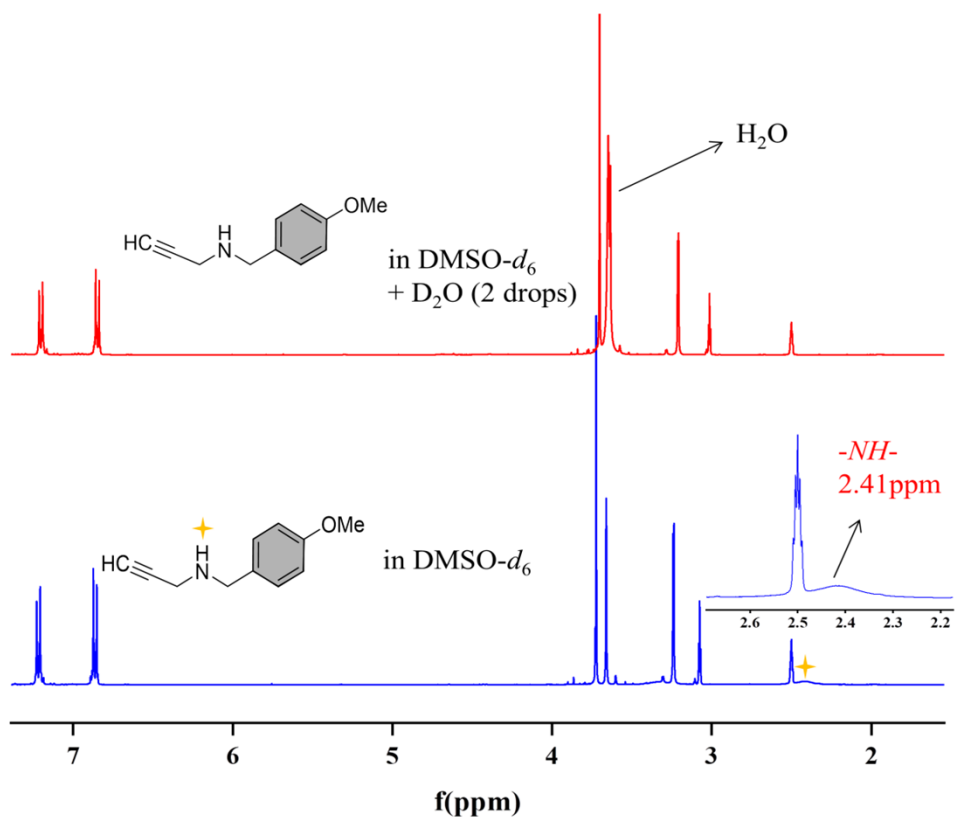

Fig. S35 Hydrogen–deuterium exchange experiment in D $_2$ O/DMSO- $d_6$ .

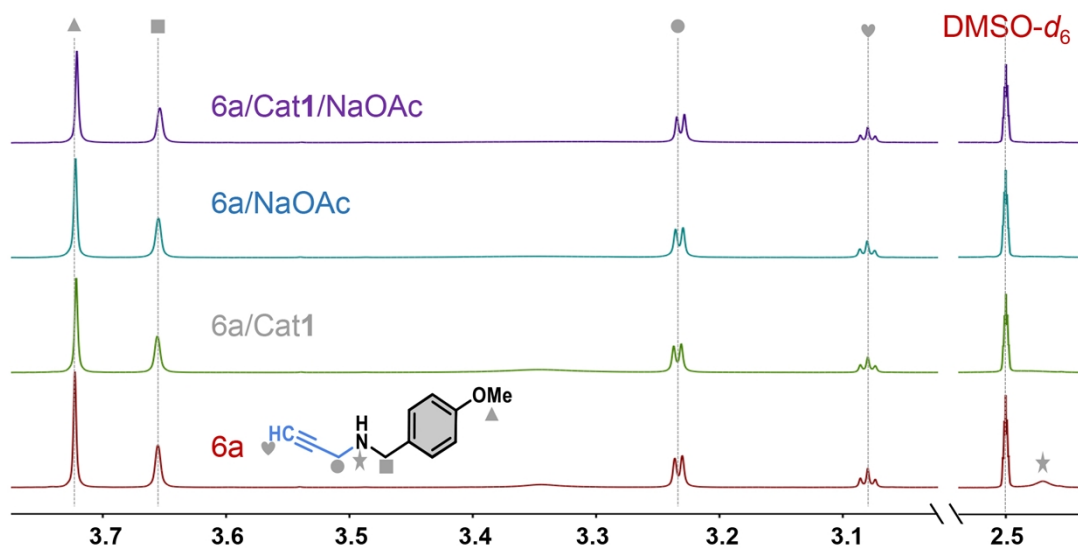

Fig. S36 Partially  $^1\text{H}$  NMR spectra monitoring of substrate **6a**, **6a/Cat1**, **6a/NaOAc**, and **6a/Cat1/NaOAc** in DMSO- $d_6$ .



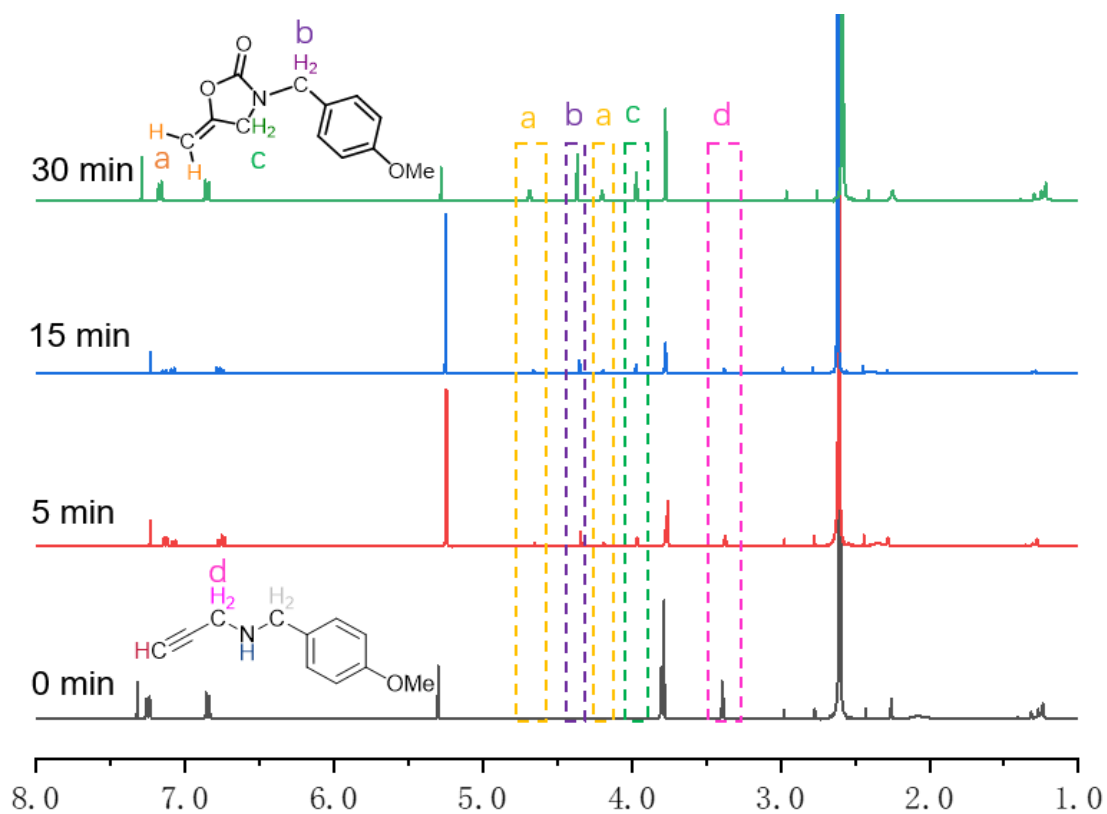

Fig. S37 Partially  $^1\text{H}$  NMR spectra monitoring of Cat1-catalyzed carboxylative cyclization of **6a** and  $\text{CO}_2$  at  $70^\circ\text{C}$ .

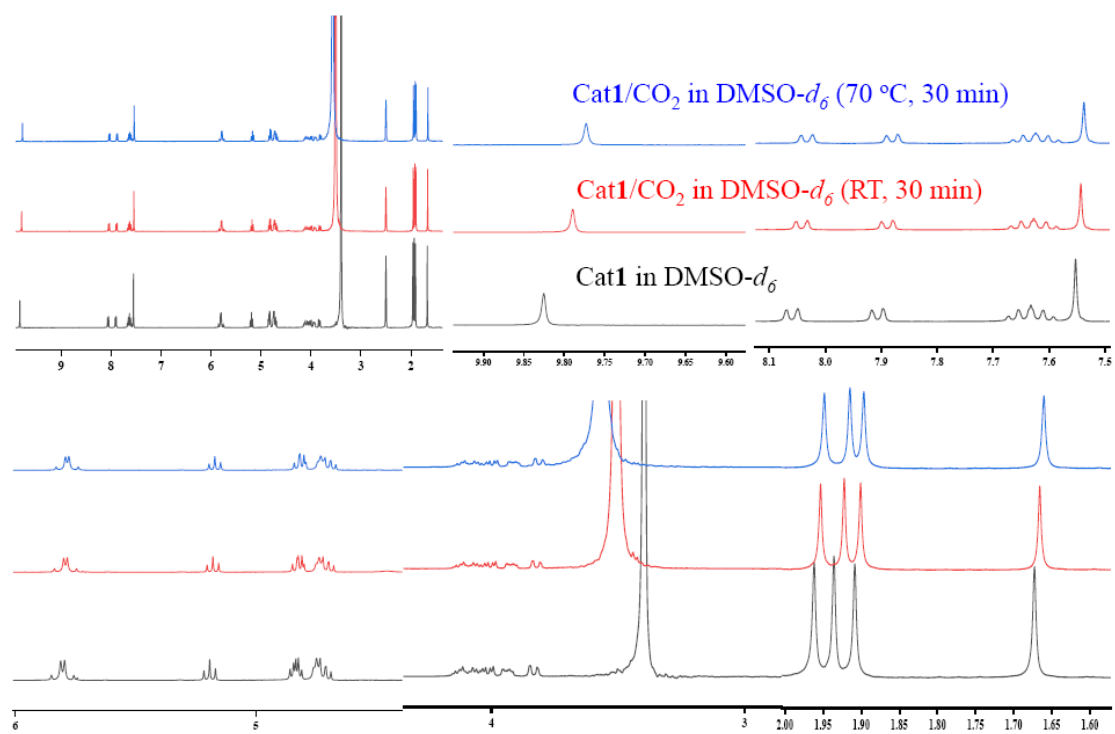

Fig. S38 The interactions between Cat1 and  $\text{CO}_2$  were investigated by  $^1\text{H}$  NMR.

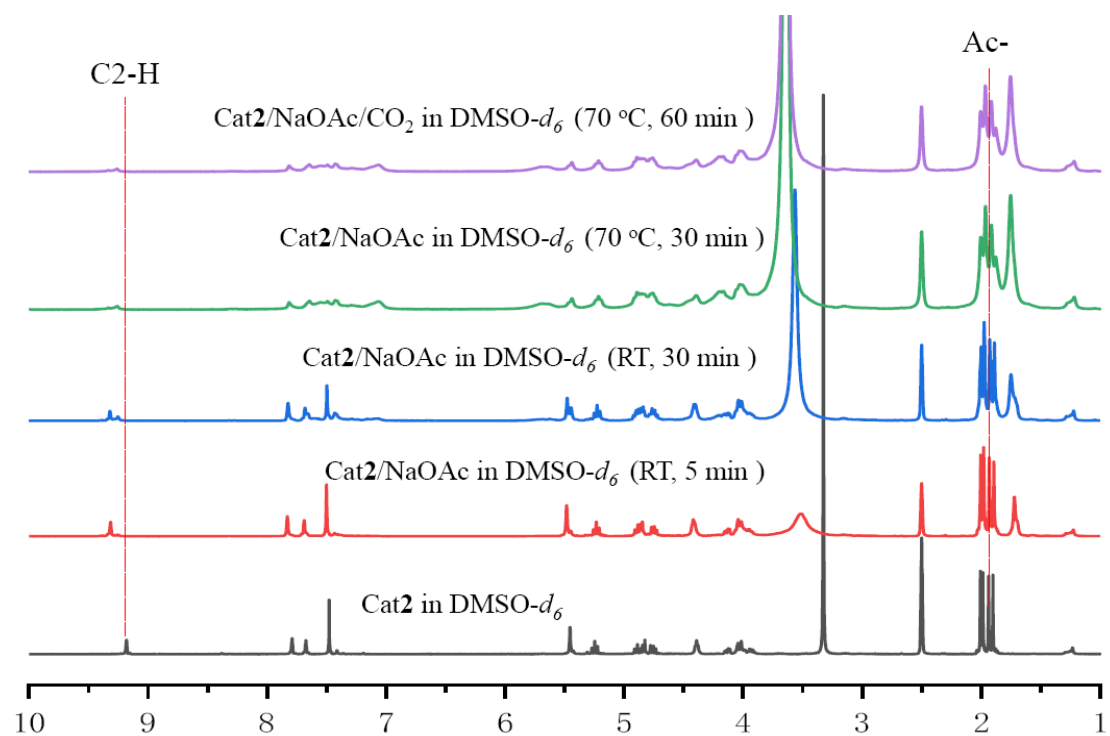

Fig. S39 The interactions between Cat2 and NaOAc were investigated by  $^1\text{H}$  NMR.

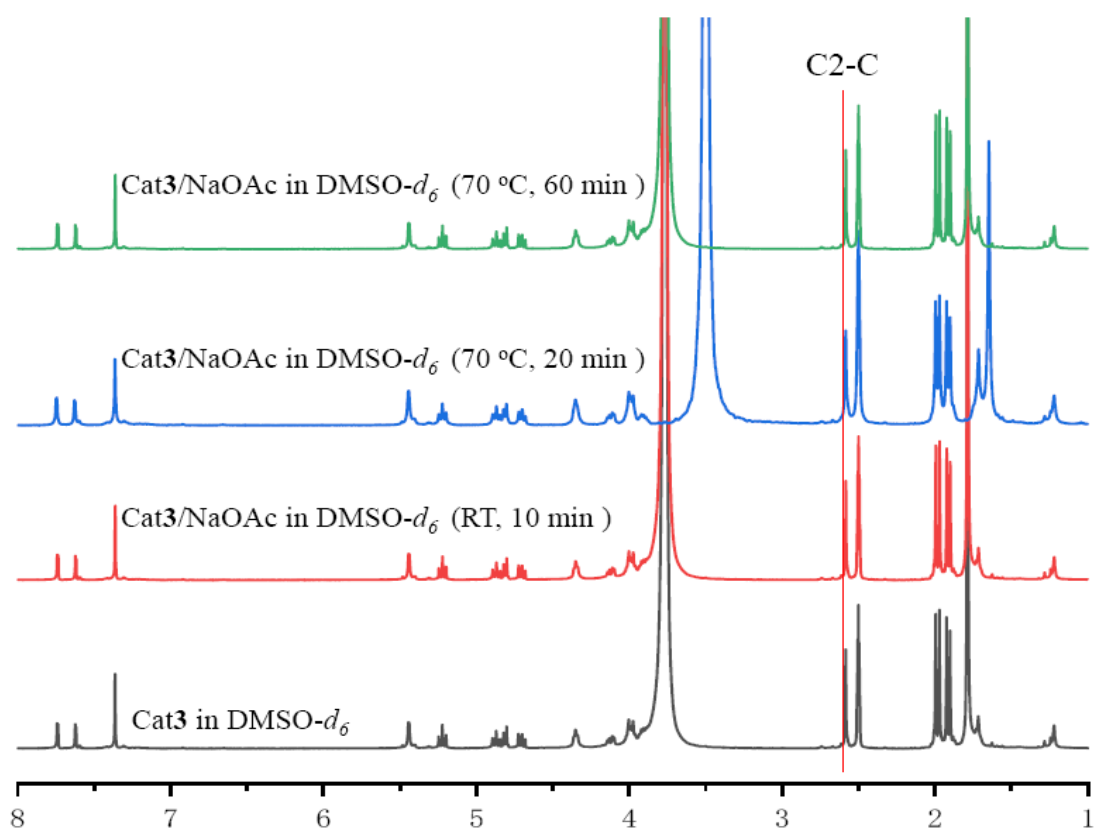

Fig. S40 The interactions between Cat3 and NaOAc were investigated by  $^1\text{H}$  NMR.

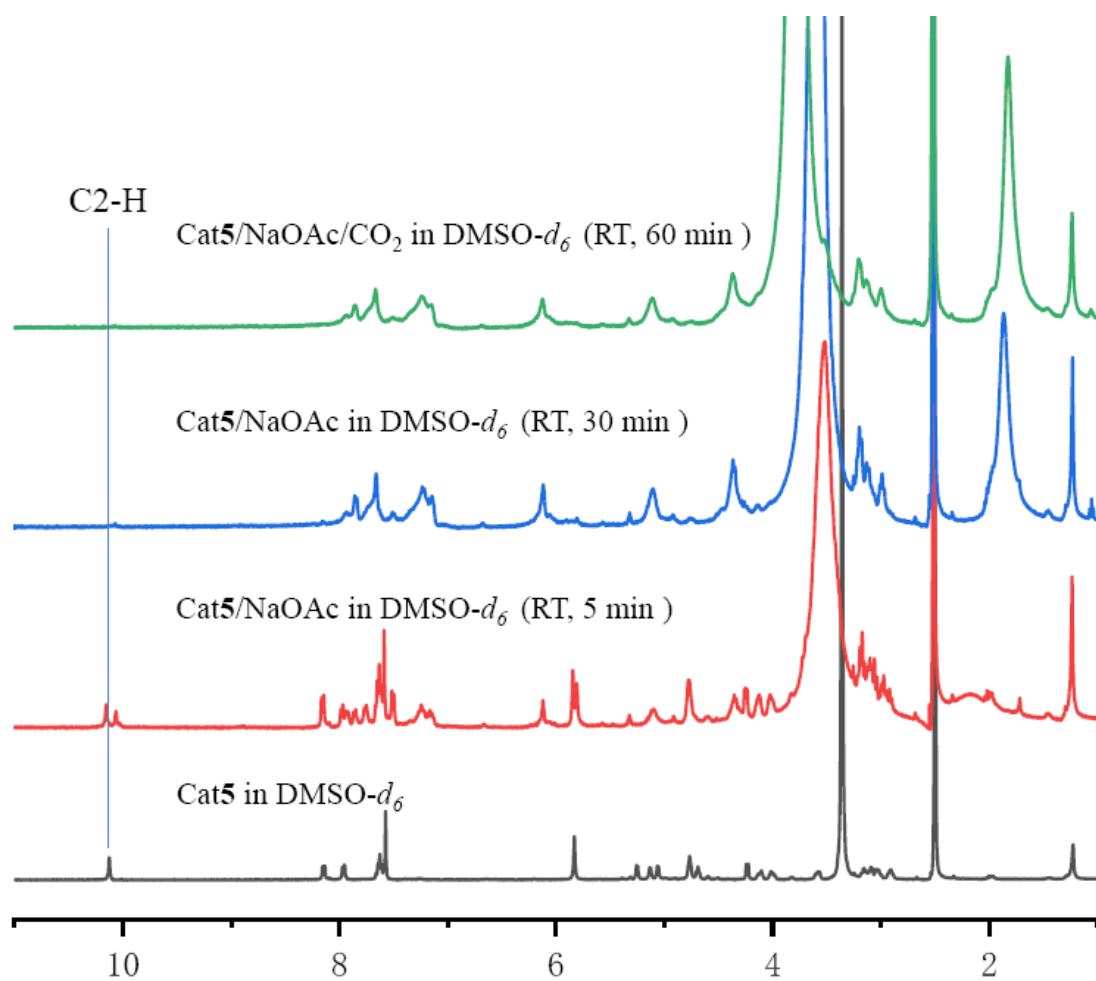

Fig. S41 The interactions between Cat5, NaOAc, and  $\text{CO}_2$  were investigated by  $^1\text{H}$  NMR.

## 7. NMR Spectra of Imidazolium Salts

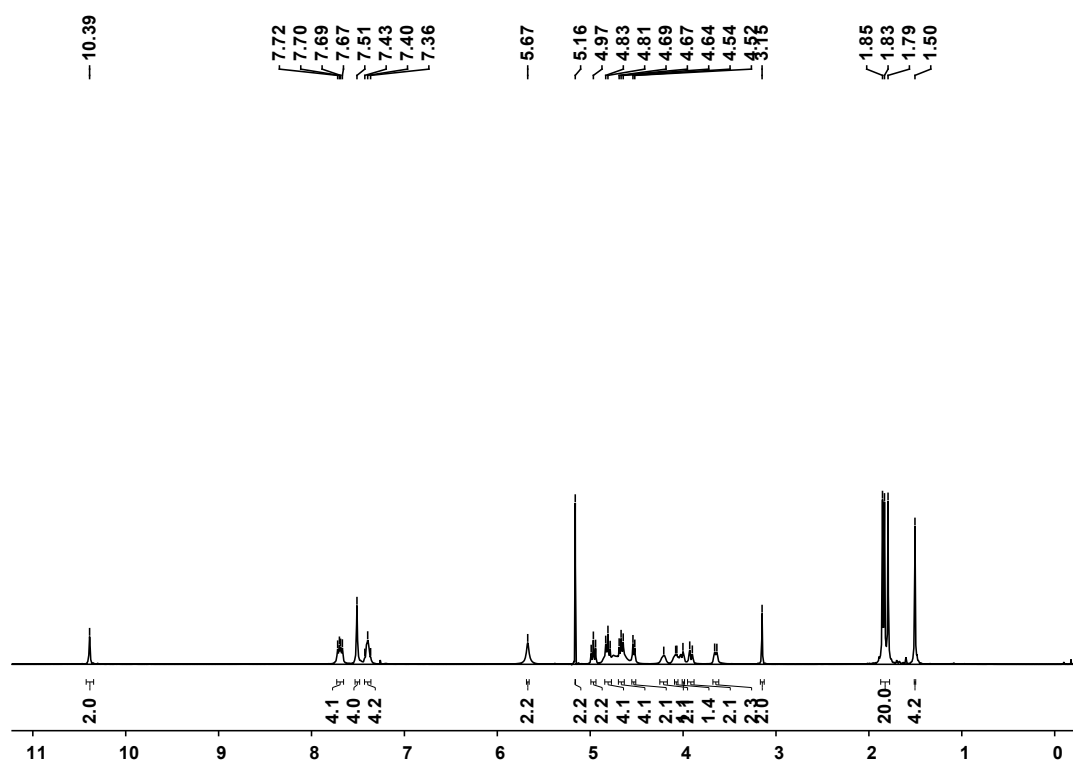

Fig. S42  $^1\text{H}$  NMR of Im-Br1 in  $\text{CDCl}_3$ .

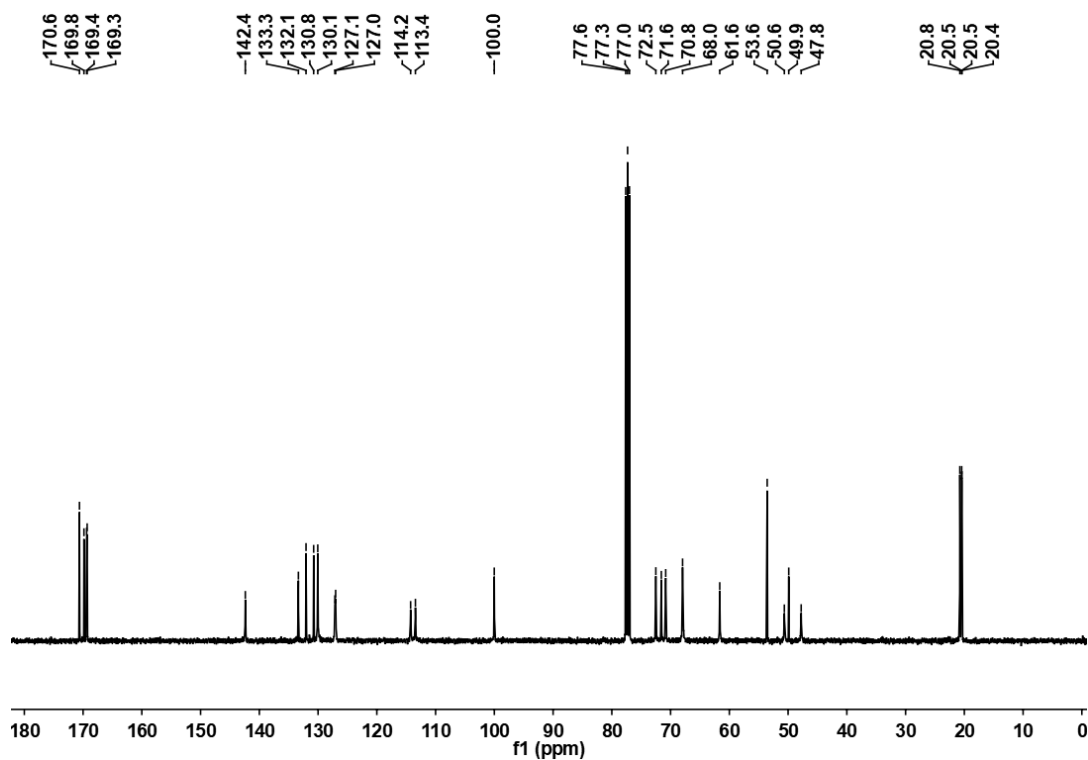

Fig. S43  $^{13}\text{C}$  NMR of Im-Br1 in  $\text{CDCl}_3$ .

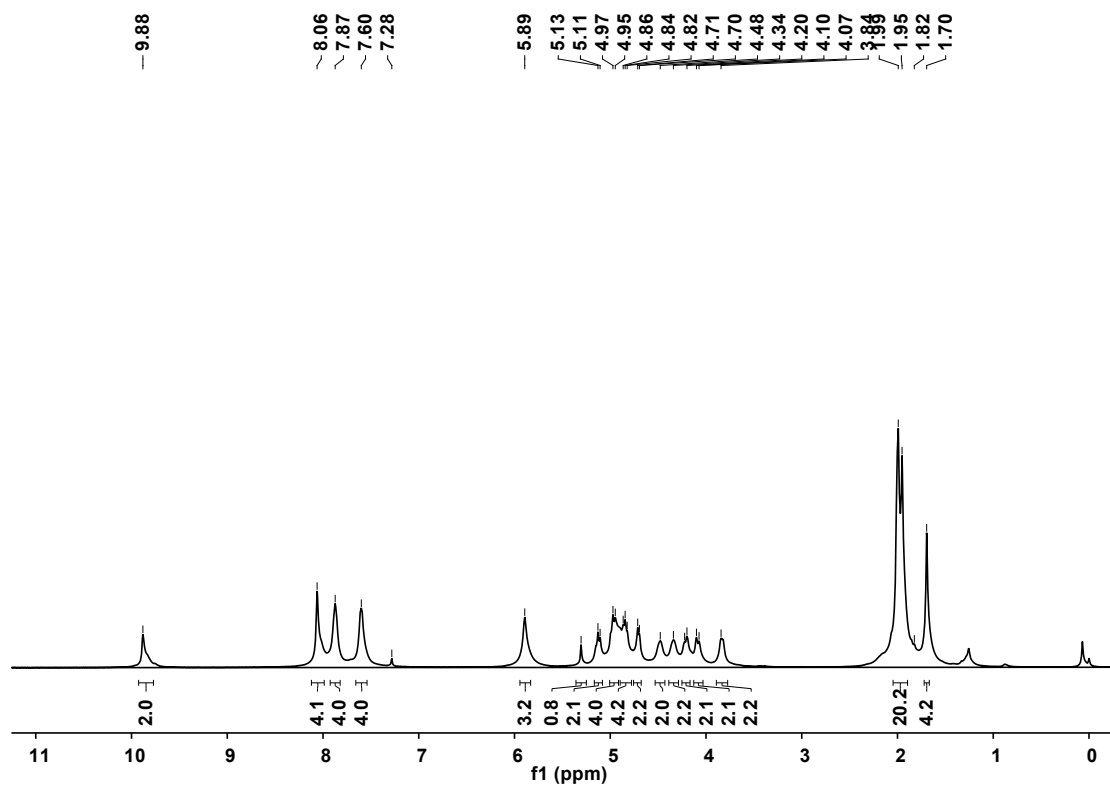

Fig. S44  $^1\text{H}$  NMR of Cat1 in  $\text{CDCl}_3$ .

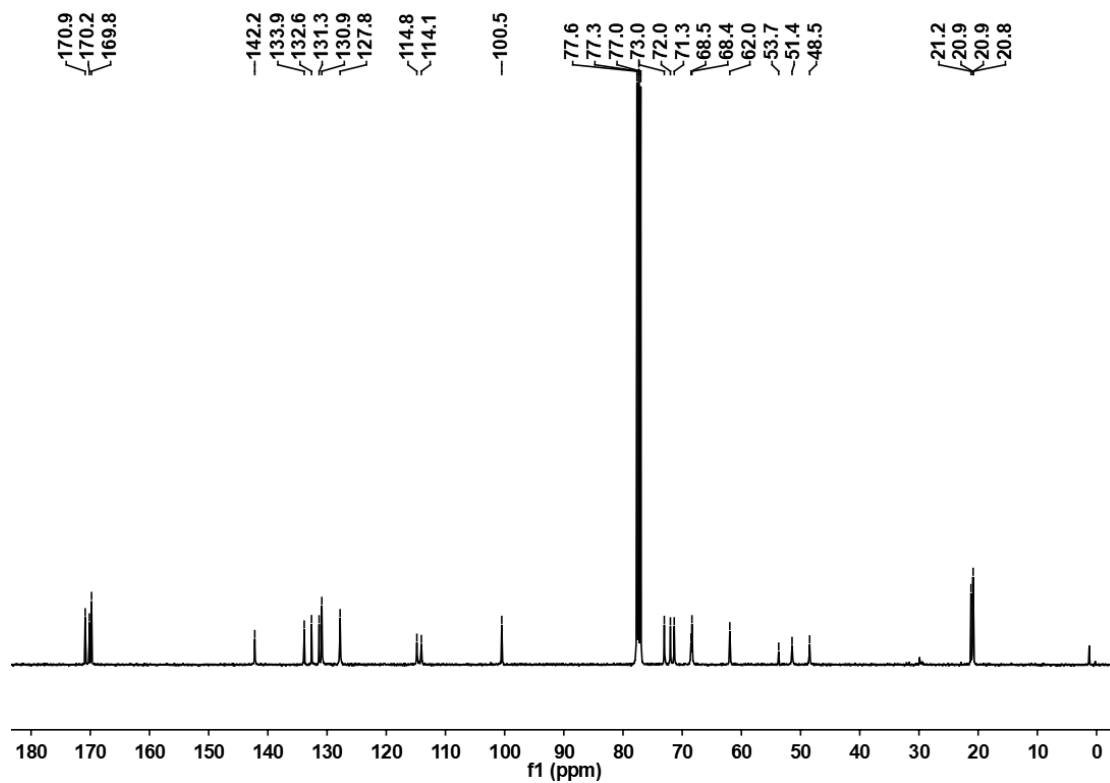

Fig. S45  $^{13}\text{C}$  NMR of Cat1 in  $\text{CDCl}_3$ .

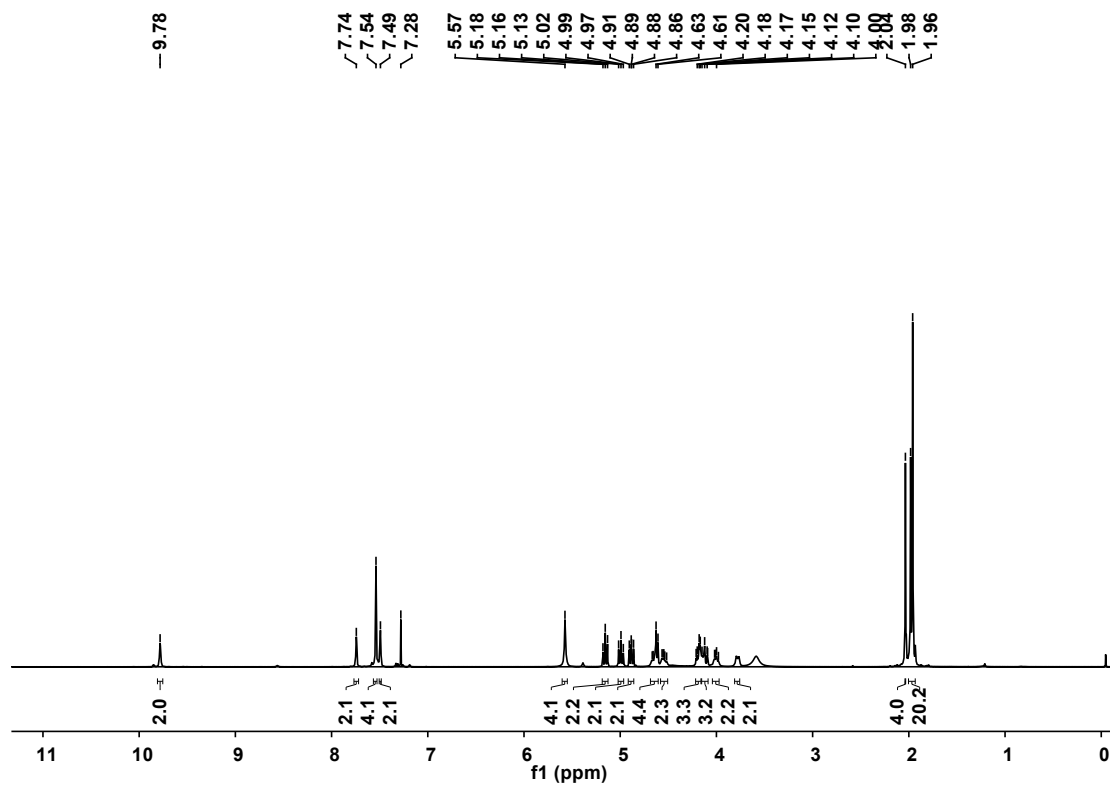

Fig. S46  $^1\text{H}$  NMR of Im-Br2 in  $\text{CDCl}_3$ .

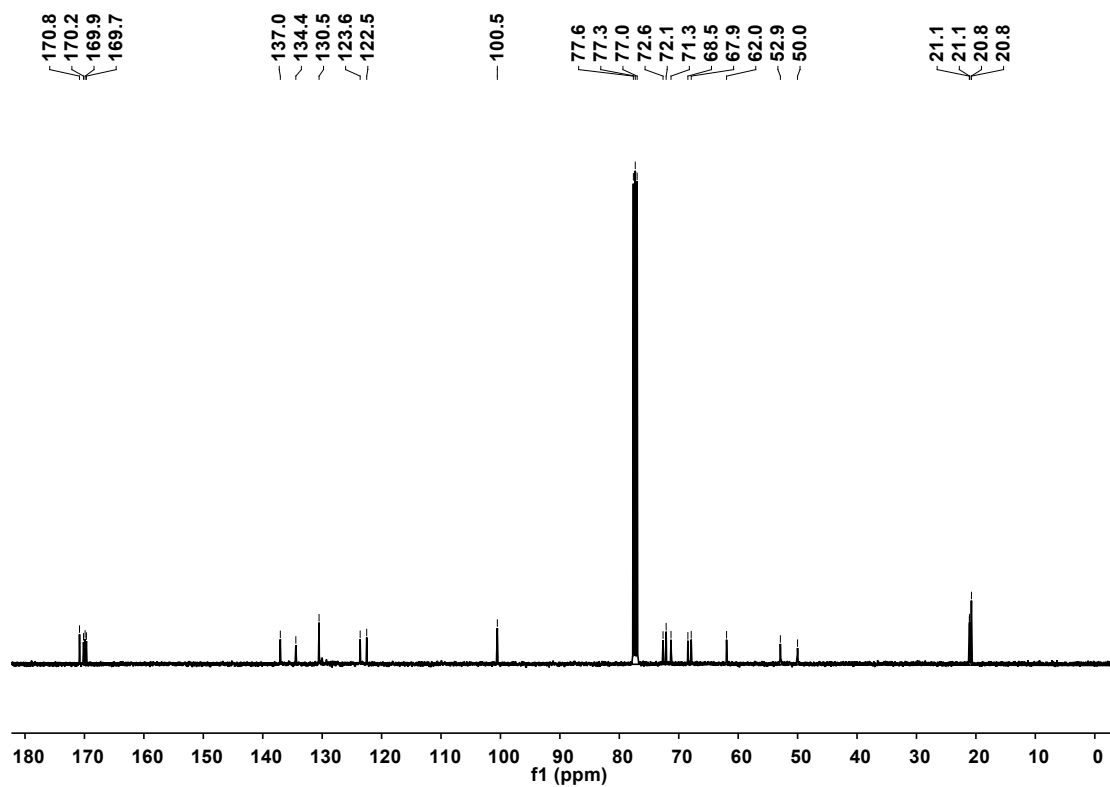

Fig. S47  $^{13}\text{C}$  NMR of Im-Br2 in  $\text{CDCl}_3$ .

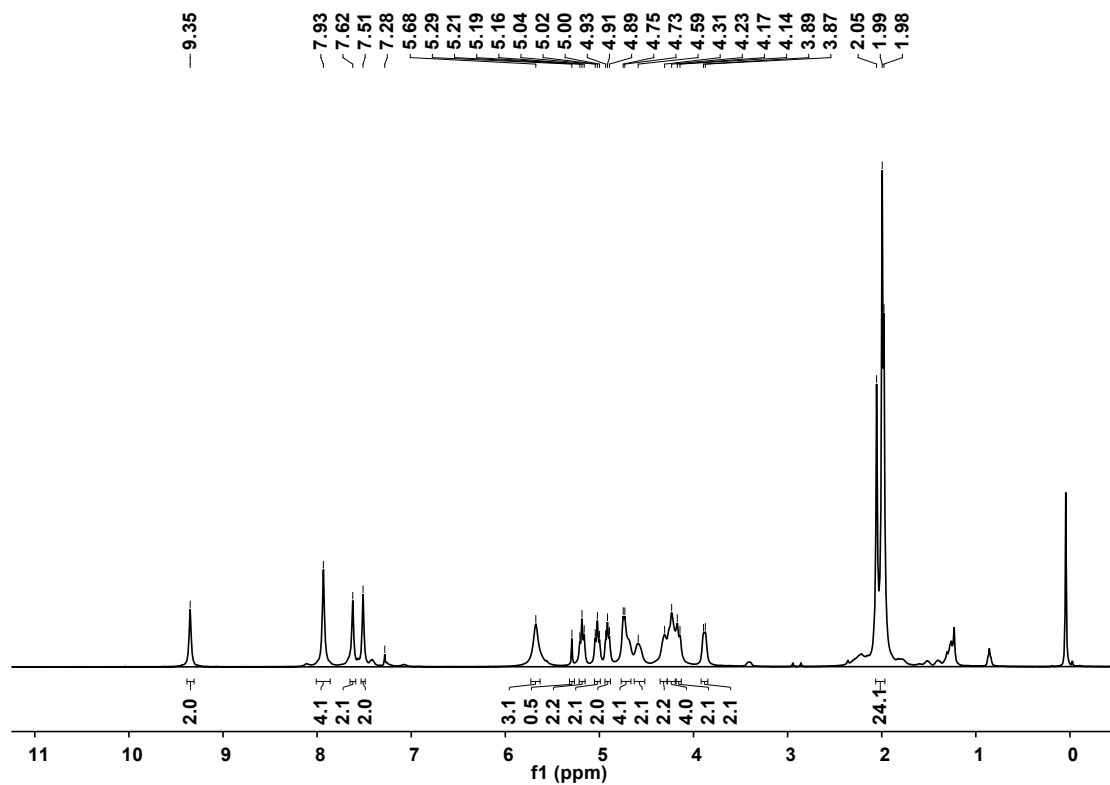

Fig. S48  $^1\text{H}$  NMR of Cat2 in  $\text{CDCl}_3$ .

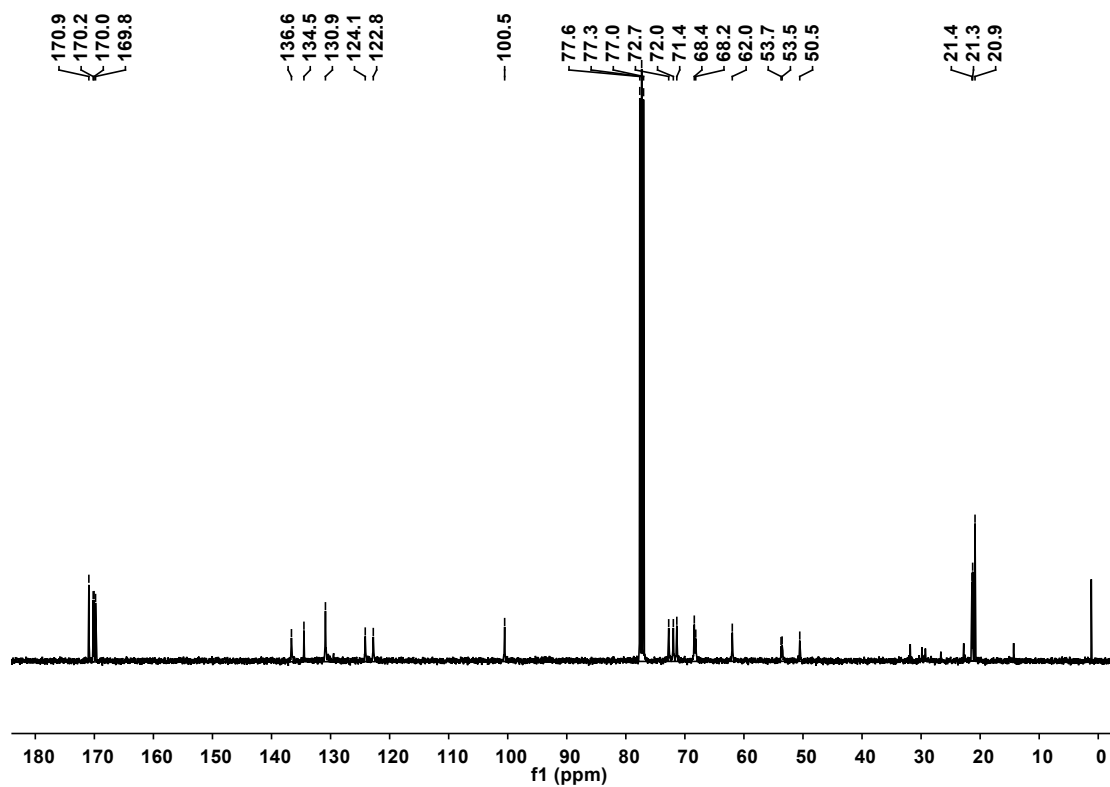

Fig. S49  $^{13}\text{C}$  NMR of Cat2 in  $\text{CDCl}_3$ .

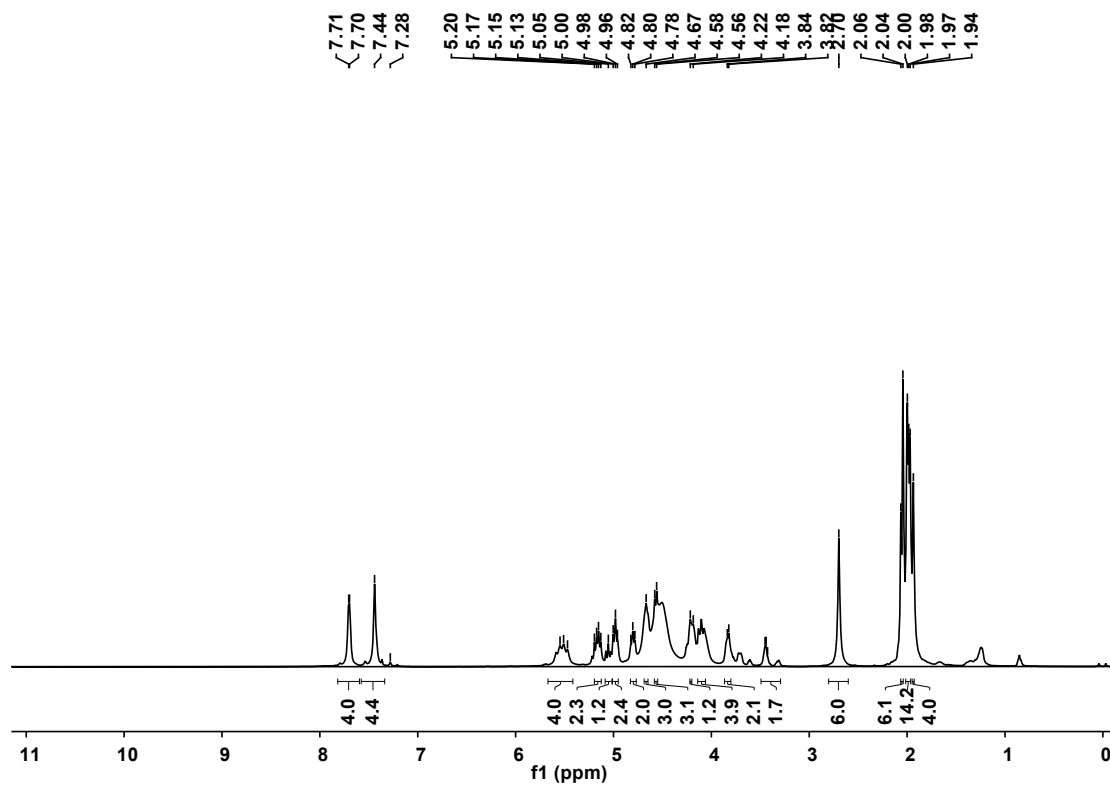

Fig. S50  $^1\text{H}$  NMR of Im-Br3 in  $\text{CDCl}_3$ .

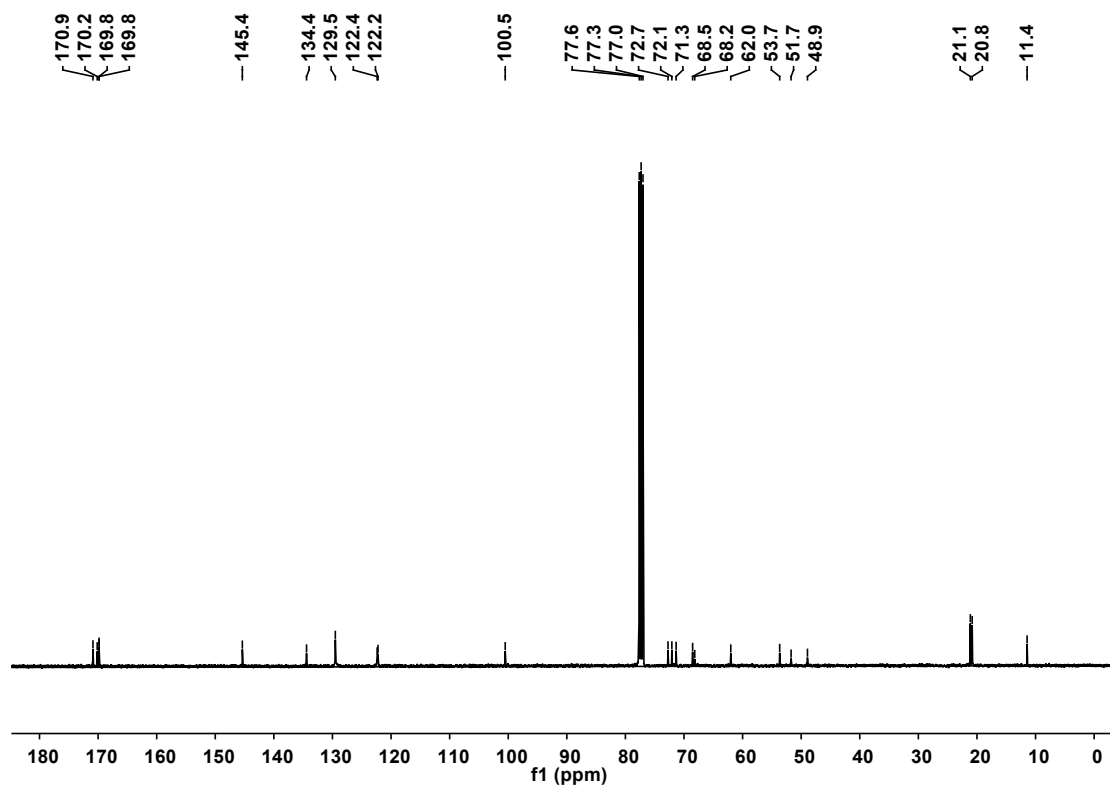

Fig. S51  $^{13}\text{C}$  NMR of Im-Br3 in  $\text{CDCl}_3$ .



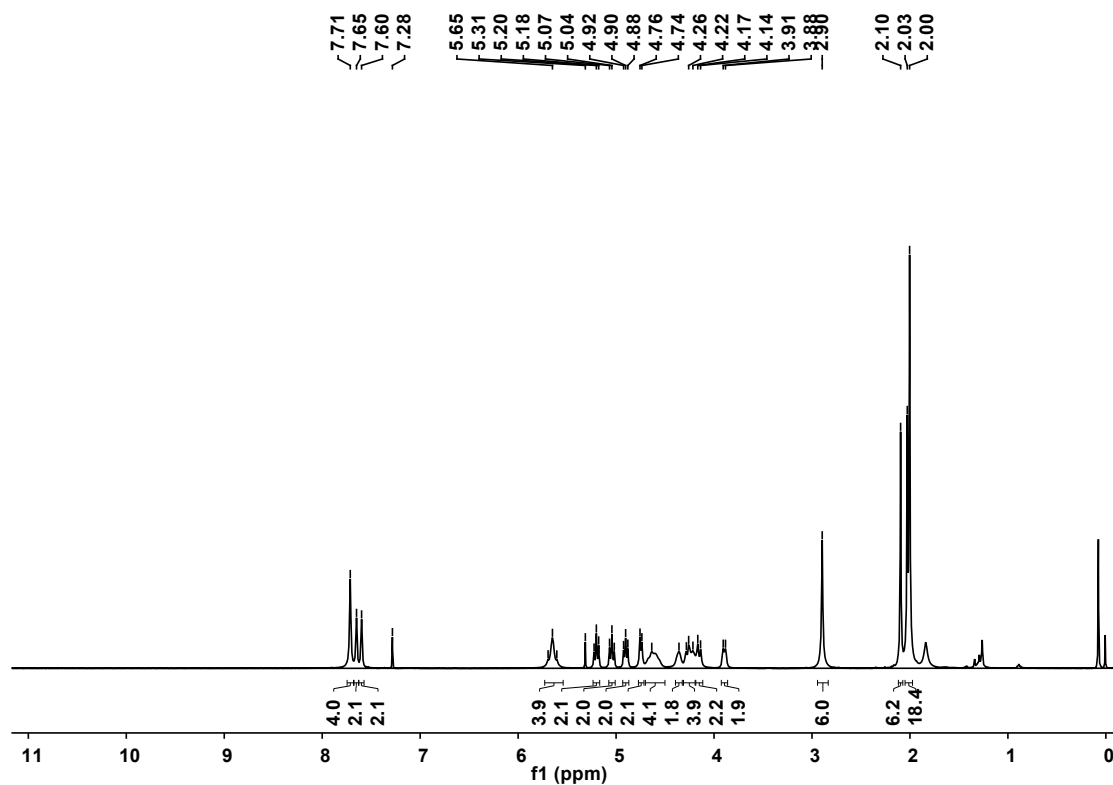

Fig. S52  $^1\text{H}$  NMR of Cat3 in  $\text{CDCl}_3$ .

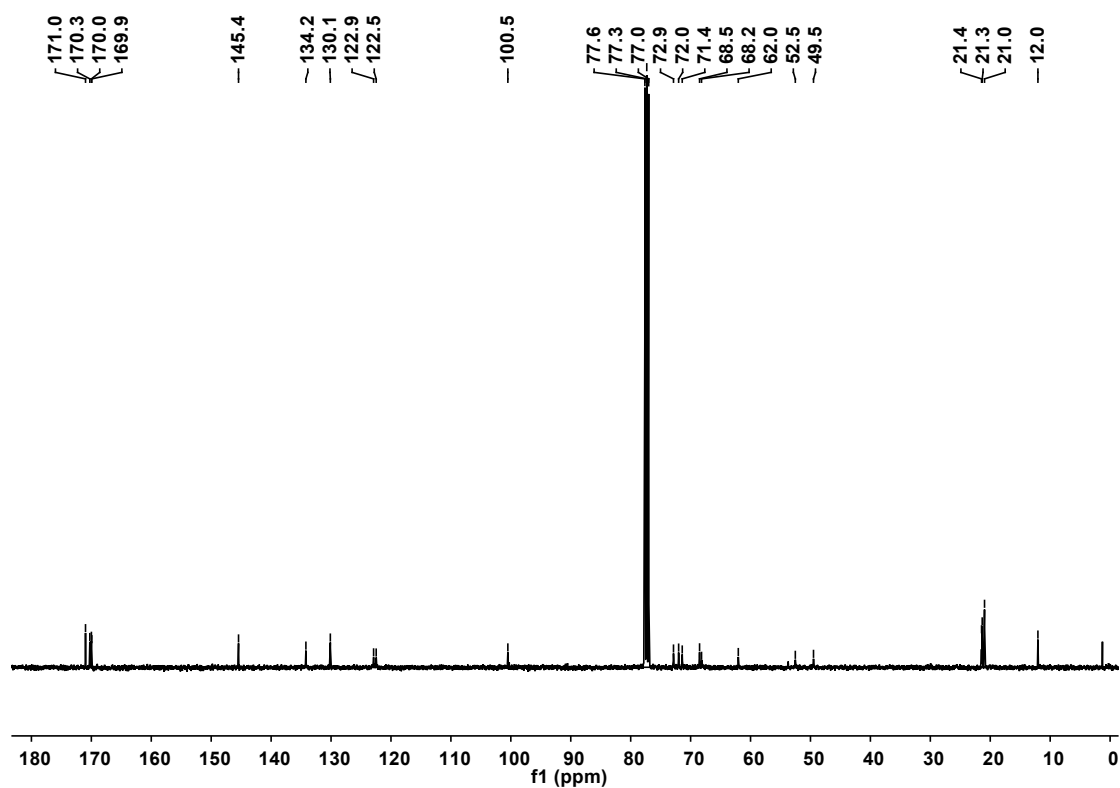

Fig. S53  $^{13}\text{C}$  NMR of Cat3 in  $\text{CDCl}_3$ .

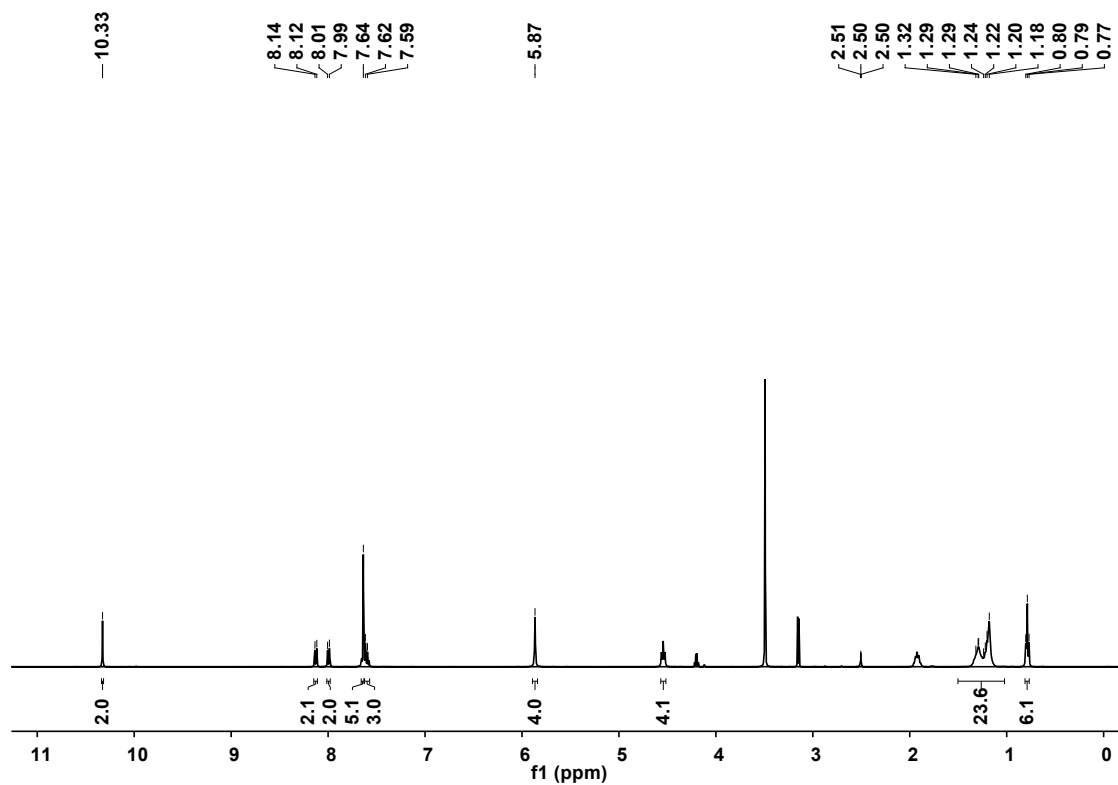

Fig. S54  $^1\text{H}$  NMR of Im-Br4 in  $\text{DMSO-}d_6$ .

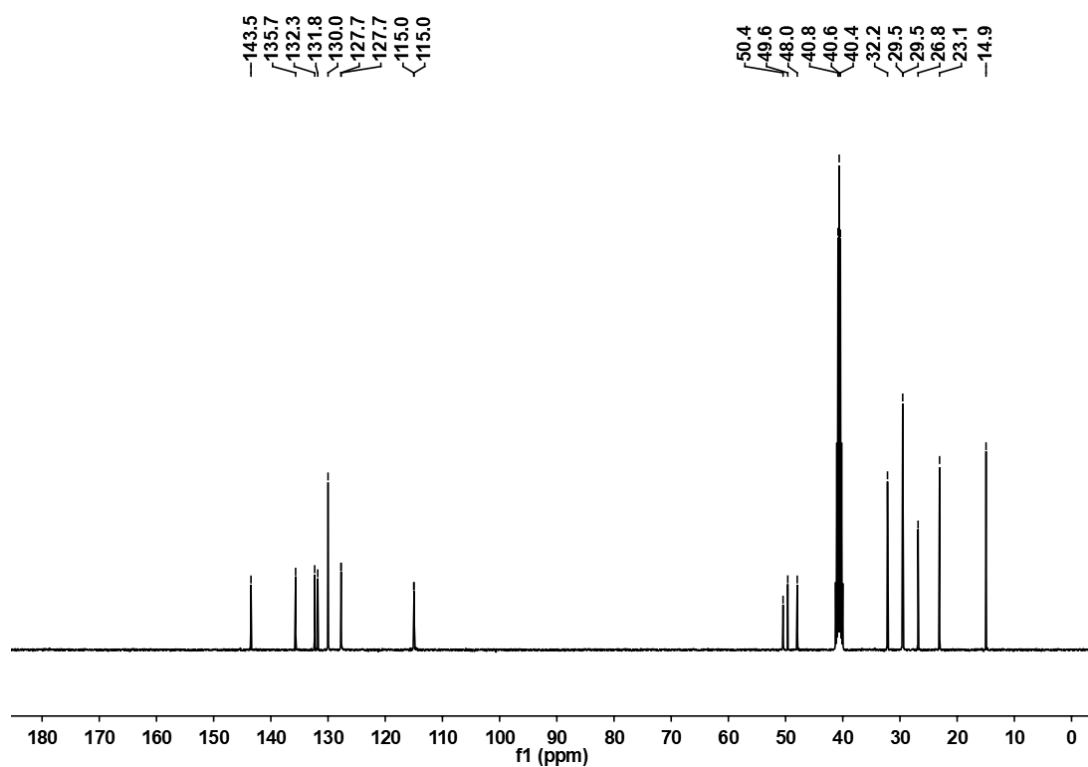

Fig. S55  $^{13}\text{C}$  NMR of Im-Br4 in  $\text{DMSO-}d_6$ .

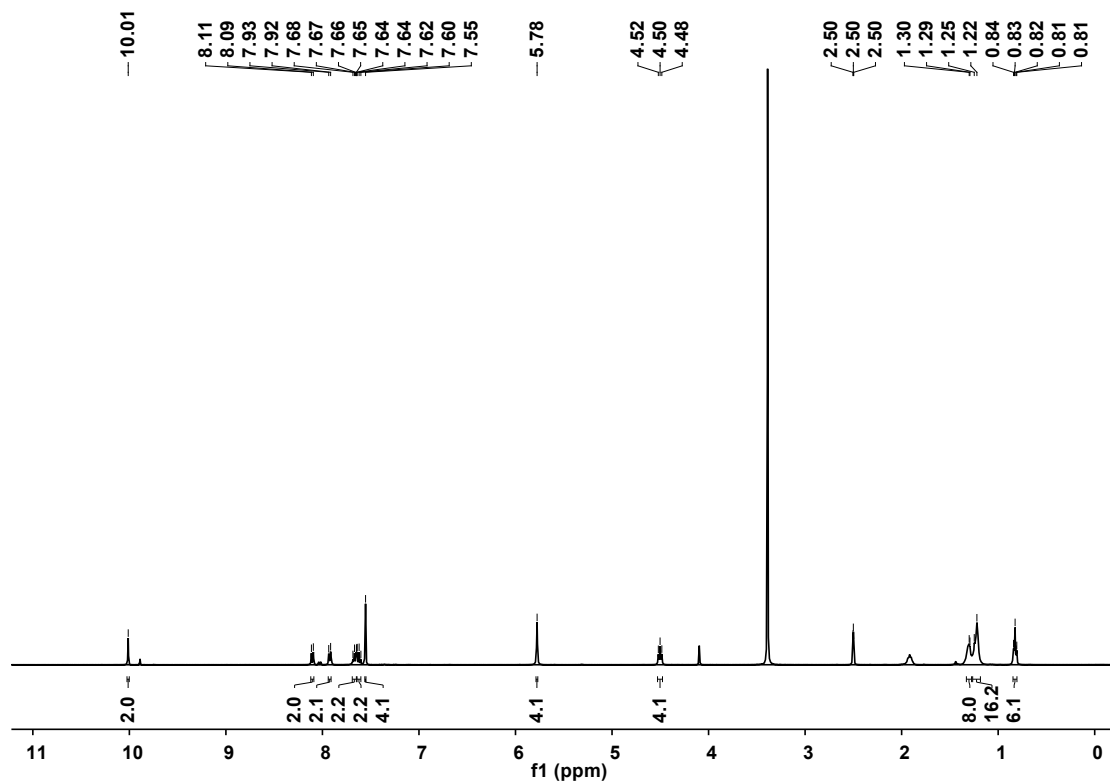

Fig. S56  $^1\text{H}$  NMR of Cat4 in  $\text{DMSO-}d_6$ .

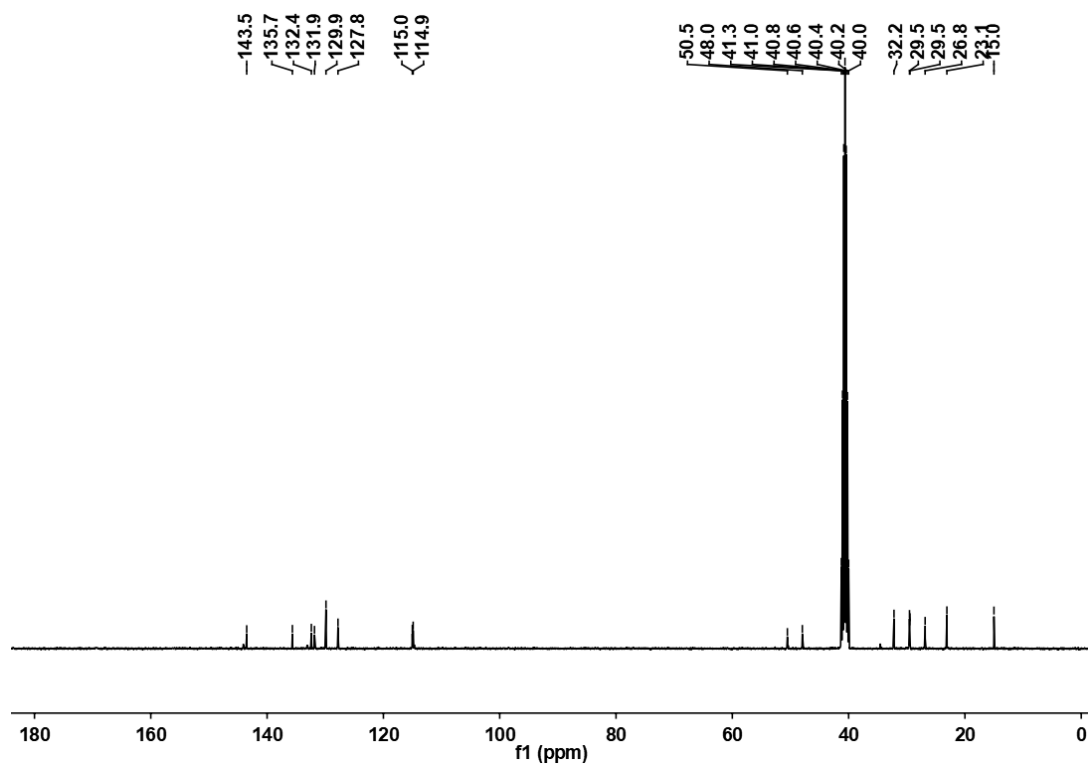

Fig. S57  $^{13}\text{C}$  NMR of Cat4 in  $\text{DMSO-}d_6$ .

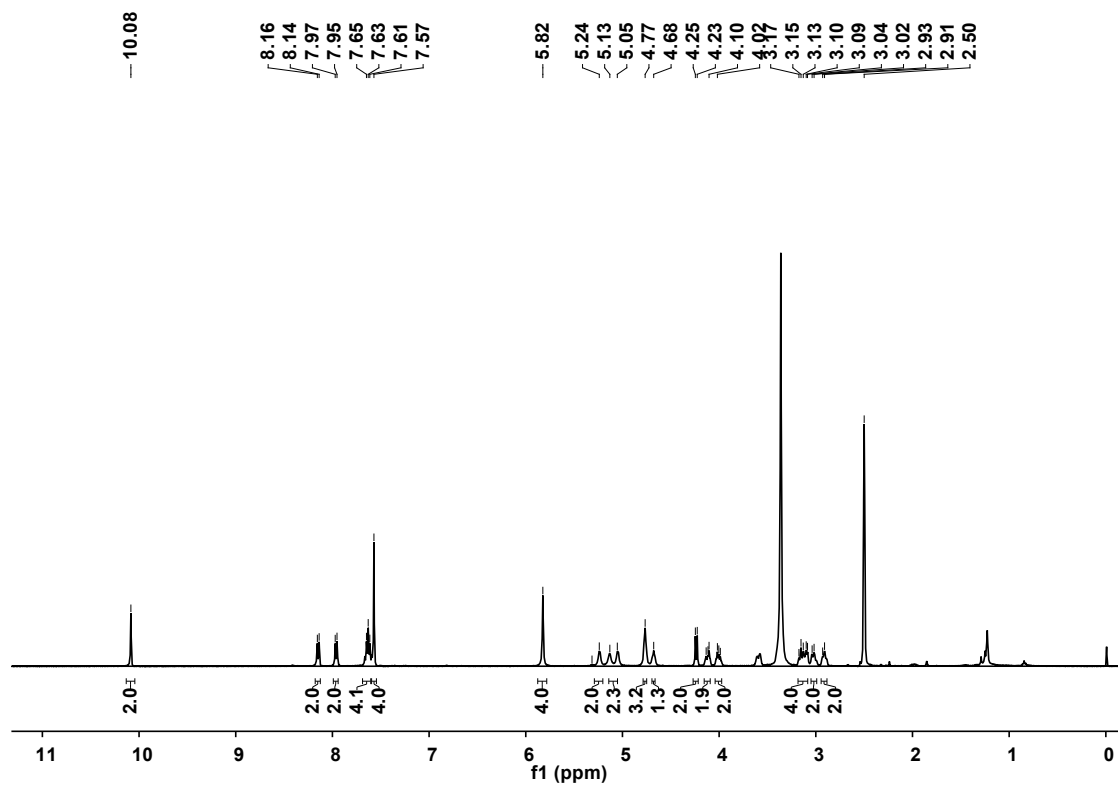

Fig. S58  $^1\text{H}$  NMR of Im-Br5 in  $\text{DMSO-}d_6$ .

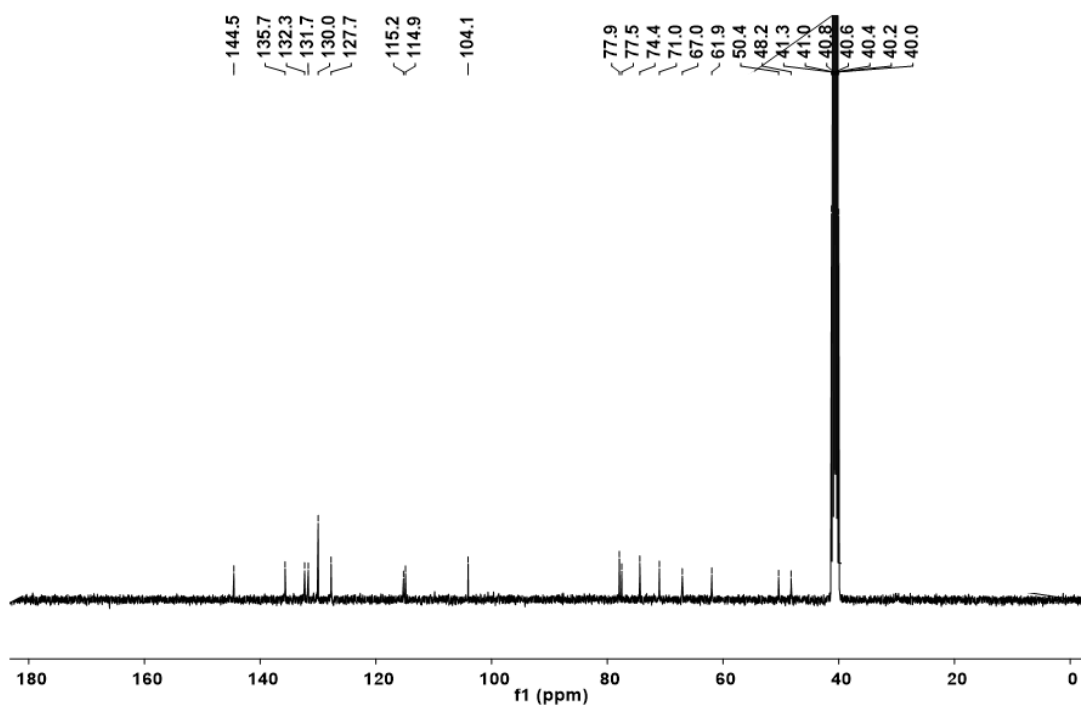

Fig. S59  $^{13}\text{C}$  NMR of Im-Br5 in  $\text{DMSO-}d_6$ .

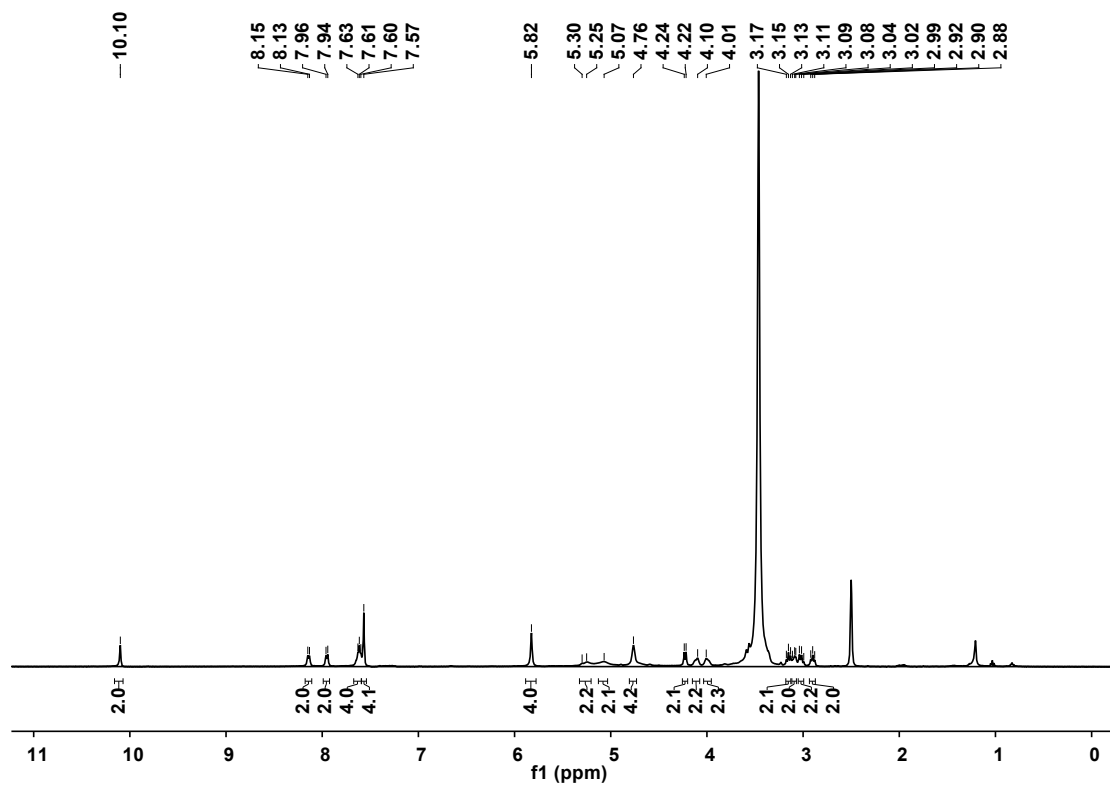

Fig. S60  $^1\text{H}$  NMR of Cat5 in  $\text{DMSO-}d_6$ .

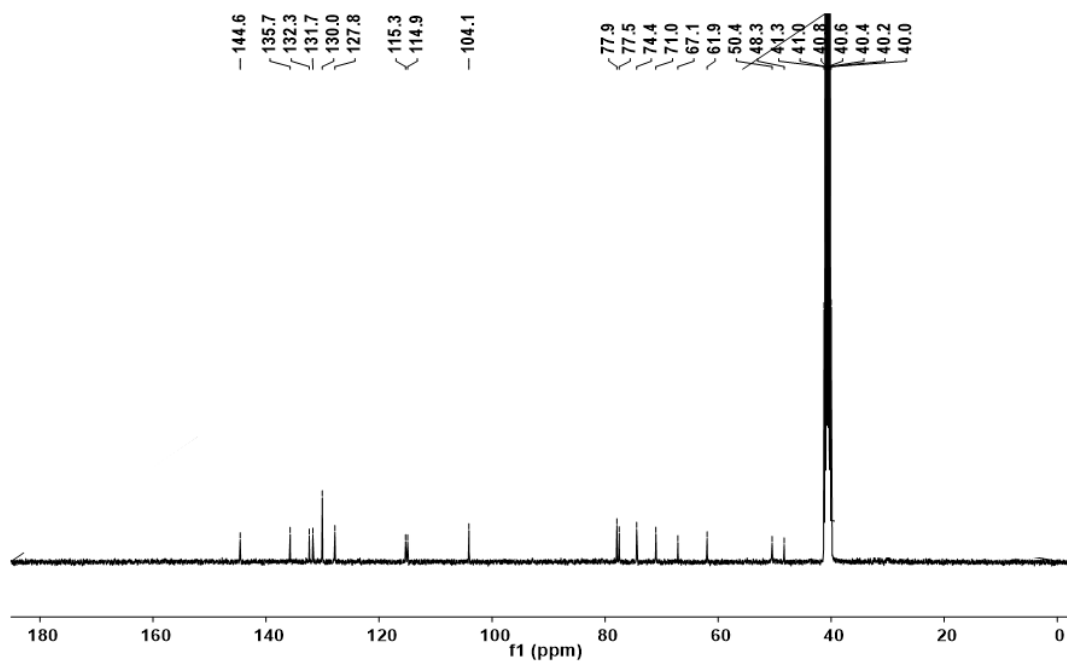

Fig. S61  $^{13}\text{C}$  NMR of Cat5 in  $\text{DMSO-}d_6$ .

## 8. References

1. Y. Zhao, J. Qiu, L. Tian, Z. Li, M. Fan and J. Wang, *ACS Sustainable Chem. Eng.*, 2016, **4**, 5553-5560.
2. Y. Shunsuke, F. Kosuke, K. Satoshi and Y. Tohru, *Chem. Lett.*, 2009, **38**, 786-787.
3. M. Yoshida, T. Mizuguchi and K. Shishido, *Chem. Eur. J.*, 2012, **18**, 15578-15581.
4. Z.-H. Zhou, S.-M. Xia, S.-Y. Huang, Y.-Z. Huang, K.-H. Chen and L.-N. He, *J. CO<sub>2</sub> Util.*, 2019, **34**, 404-410.
5. X. Liu, M.-Y. Wang, S.-Y. Wang, Q. Wang and L.-N. He, *ChemSusChem*, 2017, **10**, 1210-1216.
6. M. Zhao, S. Huang, Q. Fu, W. Li, R. Guo, Q. Yao, F. Wang, P. Cui, C.-H. Tung and D. Sun, *Angew. Chem. Int. Ed.*, 2020, **59**, 20031-20036.
7. Z. Chang, X. Jing, C. He, X. Liu and C. Duan, *ACS Catal.*, 2018, **8**, 1384-1391.
8. C.-S. Cao, S.-M. Xia, Z.-J. Song, H. Xu, Y. Shi, L.-N. He, P. Cheng and B. Zhao, *Angew. Chem. Int. Ed.*, 2020, **59**, 8586-8593.
9. P. Brunel, J. Monot, C. E. Kefalidis, L. Maron, B. Martin-Vaca and D. Bourissou, *ACS Catal.*, 2017, **7**, 2652-2660.
10. S. Ghosh, R. A. Molla, U. Kayal, A. Bhaumik and S. M. Islam, *Dalton Trans.*, 2019, **48**, 4657-4666.
11. Y. Zhang, X. Lan, F. Yan, X. He, J. Wang, L. Ricardez-Sandoval, L. Chen and G. Bai, *Green Chem.*, 2022, **24**, 930-940.
12. A.-L. Gu, Y.-X. Zhang, Z.-L. Wu, H.-Y. Cui, T.-D. Hu and B. Zhao, *Angew. Chem. Int. Ed.*, 2022, **61**, e202114817.
13. X. L. Jiang, Y. E. Jiao, S. L. Hou, L. C. Geng, H. Z. Wang and B. Zhao, *Angew. Chem. Int. Ed.*, 2021, **60**, 20417-20423.
14. S. Ghosh, S. Riyajuddin, S. Sarkar, K. Ghosh and S. M. Islam, *ChemNanoMat*, 2020, **6**, 160-172.
15. S. Hase, Y. Kayaki and T. Ikariya, *ACS Catal.*, 2015, **5**, 5135-5140.
16. S. Hase, Y. Kayaki and T. Ikariya, *Organometallics*, 2012, **32**, 5285-5288.
17. F. Inagaki, K. Maeda, K. Nakazawa and C. Mukai, *Eur. J. Org. Chem.*, 2018, **2018**, 2972-2976.
18. F. Inagaki, K. Maeda, K. Nakazawa and C. Mukai, *J. Org. Chem.*, 2018, **2018**, 2972-2976.
19. X. Wang, Z. Chang, X. Jing, C. He and C. Duan, *ACS Omega*, 2019, **4**, 10828-10833.
20. K.-i. Fujita, K. Inoue, J. Sato, T. Tsuchimoto and H. Yasuda, *Tetrahedron*, 2016, **72**, 1205-1212.

21. Z.-G. Zhou, P. He, J. Li, J. Zhang, G. Xu, S.-Y. Zhang, X.-X. Deng, Z.-Y. Du, G.-T. Luo, H.-Y. Zhen, Y. Chen and C.-T. He, *Org. Chem. Front.*, 2023, **10**, 2045-2053.
22. L. Li, Y. Lv, H. Sheng, Y. Du, H. Li, Y. Yun, Z. Zhang, H. Yu and M. Zhu, *Nat. Commun.*, 2023, **14**, 6989.
23. W.-Z. Qiao, Y.-J. Wang, S. Li, R. Wang, J. Wu and S.-Q. Zang, *CCS Chemistry*, 2024, **6**, 1-11.
24. X.-J. Zhang, L.-F. Kong, X. Lu, Y.-L. Liu, Y. Hu, H.-W. Gong, Y.-J. Li and Z.-G. Zhou, *J. Carbohydr. Chem.*, 2024, **42**, 180-196.
25. J. Qiu, X. Qi, K. Zhu, Y. Zhao, H. Wang, Z. Li, H. Wang, Y. Zhao and J. Wang, *Green Chemistry*, 2024, DOI: 10.1039/d4gc00122b.
26. Q. Cao, W. Sun, Z. Xiao, X. Zhou, L. Lu, H. Hou, Y. Chen and L. Wang, *Small*, 2024, DOI: 10.1002/sml.202404202, e2404202.
